# Supplementary material for: When COVID-19 enters in a community setting: an exploratory qualitative study of community perspectives on COVID-19 affecting mental well-being
Source: PubMed Central journal article supplement — BMJ Open. 2021 May 12;11(5):e049851. doi: 10.1136/bmjopen-2021-049851 (PMC8126434; doi:10.1136/bmjopen-2021-049851), 2021-05-12
Supplement: bmjopen-2021-049851.draft_revisions.pdf [file bmjopen-2021-049851.draft_revisions.pdf]

# BMJ Open

BMJ Open is committed to open peer review. As part of this commitment we make the peer review history of every article we publish publicly available.

When an article is published we post the peer reviewers' comments and the authors' responses online. We also post the versions of the paper that were used during peer review. These are the versions that the peer review comments apply to.

The versions of the paper that follow are the versions that were submitted during the peer review process. They are not the versions of record or the final published versions. They should not be cited or distributed as the published version of this manuscript.

BMJ Open is an open access journal and the full, final, typeset and author-corrected version of record of the manuscript is available on our site with no access controls, subscription charges or pay-per-view fees (<http://bmjopen.bmj.com>).

If you have any questions on BMJ Open's open peer review process please email [info.bmjopen@bmj.com](mailto:info.bmjopen@bmj.com)

# BMJ Open

## When COVID-19 enters in a community setting: An exploratory qualitative study of community perspectives on COVID-19 affecting mental well-being

|                               |                                                                                                                                                                                                                                                                                                                                                    |
|-------------------------------|----------------------------------------------------------------------------------------------------------------------------------------------------------------------------------------------------------------------------------------------------------------------------------------------------------------------------------------------------|
| Journal:                      | <i>BMJ Open</i>                                                                                                                                                                                                                                                                                                                                    |
| Manuscript ID                 | bmjopen-2021-049851                                                                                                                                                                                                                                                                                                                                |
| Article Type:                 | Original research                                                                                                                                                                                                                                                                                                                                  |
| Date Submitted by the Author: | 05-Feb-2021                                                                                                                                                                                                                                                                                                                                        |
| Complete List of Authors:     | ali, naureen; The Aga Khan University, Feroz, Anam; Aga Khan University<br>Akber Ali, Noshaba; Aga Khan University<br>Feroz, Rida; Aga Khan University Institute for Educational Development<br>Pakistan<br>Nazim Meghani, Salima; Aga Khan University, Community Health Sciences<br>Saleem, Sarah; Aga Khan University, Community Health Sciences |
| Keywords:                     | COVID-19, Public health < INFECTIOUS DISEASES, PRIMARY CARE                                                                                                                                                                                                                                                                                        |
|                               |                                                                                                                                                                                                                                                                                                                                                    |

SCHOLARONE™  
Manuscripts

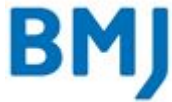

I, the Submitting Author has the right to grant and does grant on behalf of all authors of the Work (as defined in the below author licence), an exclusive licence and/or a non-exclusive licence for contributions from authors who are: i) UK Crown employees; ii) where BMJ has agreed a CC-BY licence shall apply, and/or iii) in accordance with the terms applicable for US Federal Government officers or employees acting as part of their official duties; on a worldwide, perpetual, irrevocable, royalty-free basis to BMJ Publishing Group Ltd ("BMJ") its licensees and where the relevant Journal is co-owned by BMJ to the co-owners of the Journal, to publish the Work in this journal and any other BMJ products and to exploit all rights, as set out in our [licence](#).

The Submitting Author accepts and understands that any supply made under these terms is made by BMJ to the Submitting Author unless you are acting as an employee on behalf of your employer or a postgraduate student of an affiliated institution which is paying any applicable article publishing charge ("APC") for Open Access articles. Where the Submitting Author wishes to make the Work available on an Open Access basis (and intends to pay the relevant APC), the terms of reuse of such Open Access shall be governed by a Creative Commons licence – details of these licences and which [Creative Commons](#) licence will apply to this Work are set out in our licence referred to above.

Other than as permitted in any relevant BMJ Author's Self Archiving Policies, I confirm this Work has not been accepted for publication elsewhere, is not being considered for publication elsewhere and does not duplicate material already published. I confirm all authors consent to publication of this Work and authorise the granting of this licence.

**Paper title:**

When COVID-19 enters in a community setting: An exploratory qualitative study of community perspectives on COVID-19 affecting mental well-being

**Author names:**

- Ms. Naureen Akber Ali<sup>1\*</sup> (NAA)
- Ms. Anam Shahil Feroz<sup>2</sup>(ASF)
- Ms. Noshaba Akber Ali<sup>3</sup>(NBA)
- Ms. Rida Feroz<sup>4</sup>(RF)
- Ms. Salima Nazim Meghani<sup>5</sup>(SNM)
- Dr Sarah Saleem<sup>6</sup>(SS)

**Full institutional mailing addresses of all authors**

<sup>1</sup>The Aga Khan University – School of Nursing and Midwifery, Stadium Road, PO Box 3500, Karachi 74800, Pakistan

<sup>2,3,5,6</sup>The Aga Khan University – Department of Community Health Sciences, Stadium Road, PO Box 3500, Karachi 74800, Pakistan

<sup>4</sup>Aga Khan University Institute for Educational Development, Karachi, Pakistan

**Email addresses:**

- Ms. Naureen Akber Ali<sup>\*1</sup> - NAA - [naureen.akberali@aku.edu](mailto:naureen.akberali@aku.edu)
- Ms. Anam Shahil Feroz<sup>2</sup> - AF- [anam.sahyl@gmail.com](mailto:anam.sahyl@gmail.com)
- Ms. Noshaba Akber Ali<sup>3</sup> - NBA - [noshaba.akber07@gmail.com](mailto:noshaba.akber07@gmail.com)
- Ms. Rida Feroz<sup>4</sup> - RF - [ridah.feroz.mphil19@student.aku.edu](mailto:ridah.feroz.mphil19@student.aku.edu)
- Ms. Salima Nazim Meghani<sup>5</sup> - SNM - [salima.ratnani@gmail.com](mailto:salima.ratnani@gmail.com)
- Dr Sarah Saleem<sup>6</sup>- SS - [sarah.saleem@aku.edu](mailto:sarah.saleem@aku.edu)

**Corresponding author\*:**

- Ms. Naureen Akber Ali\*<sup>1</sup>-NAA - [naureen.akberali@aku.edu](mailto:naureen.akberali@aku.edu)

Postal Address: The Aga Khan University – School of Nursing and Midwifery, Stadium Road, PO

Box 3500, Karachi 74800, Pakistan

Phone Number: 0213-4865282

**Key words:** COVID-19, exploratory qualitative study, mental health, community, perceptions

**Word count:** 4905

## Abstract

### Objective:

The COVID-19 pandemic has certainly resulted in an increased level of anxiety and fear among the general population related to its management and infection spread. Considering the relevance of present circumstances we explored perceptions and attitudes of community members towards the COVID-19 pandemic and its impact on their mental well-being.

### Setting:

We conducted an exploratory qualitative study using a purposive sampling approach, at two communities of Karachi, Pakistan.

### Participants:

In-depth interviews were conducted with community members including, young adults, middle-aged adults, and older adults of both genders. Study data was analyzed manually using the thematic analysis technique.

### Primary Outcome:

The primary outcome is assessing community perception amidst COVID-19 pandemic and its impacts on community mental health.

### Results:

A total of 27 in-depth interviews were conducted, between May and June 2020. Three overarching themes were identified: (I) Impact of COVID-19 on the mental health of the general communities;

1  
2  
3 (II) Current coping mechanisms to adapt to the new reality; and (III) Recommendations to address  
4 the mental health of communities. Generally, community members underwent increased anxiety  
5 and fear due to the contagious nature of the virus. Alongside, social, financial, and religious  
6 repercussions of the pandemic have also heightened psychological distress among community  
7 members. However, community members were able to point out some of the coping mechanisms  
8 such as getting closer to God, connecting with family, participating in mental health sessions, and  
9 resetting lives by indulging in diverse activities. Simultaneously, they also recommended the need  
10 for remote mental health services for elders and continuous efforts by the government to address  
11 the mental health needs of the community.  
12  
13  
14  
15  
16  
17  
18  
19  
20  
21  
22  
23

24  
25 Conclusion:

26  
27  
28 COVID-19-associated mental health consequences have hit every individual in society. The study  
29 finding has the potential to guide the development of context-specific innovative mental health  
30 programs to overcome the pandemic repercussions.  
31  
32  
33  
34  
35

36 **Strengths and limitations of this study:**

- 37  
38  
39  
40  
41  
42  
43  
44  
45  
46  
47  
48  
49  
50  
51  
52  
53  
54  
55  
56  
57  
58  
59  
60
- The mental health impact of the COVID-19 pandemic is likely to last much longer than the physical health impact, and this study is positioned well to explore the perceptions and attitudes of community members towards the pandemic and its impact on their daily lives and mental well-being.
  - This study will guide the development of context specific innovative mental health programmes to support communities in the future.

- 1  
2  
3  
4  
5  
6  
7  
8  
9  
10  
11  
12  
13  
14  
15  
16  
17  
18  
19  
20  
21  
22  
23  
24  
25  
26  
27  
28  
29  
30  
31  
32  
33  
34  
35  
36  
37  
38  
39  
40  
41  
42  
43  
44  
45  
46  
47  
48  
49  
50  
51  
52  
53  
54  
55  
56  
57  
58  
59  
60
- One limitation is that to minimize the risk of infection all study respondents were interviewed online over Zoom and hence the authors did not have the opportunity to build rapport with the respondents or obtain non-verbal cues during interviews.

For peer review only



## BACKGROUND

The current outbreak of COVID-19 has been declared as a Public Health Emergency of International Concern by the World Health Organization [1]. The pandemic has not only incurred massive challenges to the global supply chains and healthcare systems but also has a detrimental effect on the overall health of individuals [2]. The outbreak has led to lockdowns and has created a havoc impact on the societies at large. Most company employees' including daily wage workers have been prohibited from accessing their workplaces or being asked to work from home which has caused job-related insecurities and financial crisis among the communities [3]. Besides, educational institutions have been closed due to which children have lost their routine of going to school, studying, and socializing with their peers [4]. Alongside, parents have been struggling on creating a structured milieu for their children. COVID-19 has hindered the normal routine life of every individual be it children, teenager, adult, or the elderly which may cause florid mental distress [5]. The crisis is engendering a burden throughout the population particularly in developing countries like Pakistan that face major challenges due to the fragile health care systems and poor economic structures[6]

The pandemic has certainly resulted in an increased level of anxiety and fear among the general population related to its management and infection spread [7]. Further, the highly contagious nature of the COVID-19 has also escalated confusion, fear, and panic among the general population. Moreover, social distancing is often an unpleasant experience for the community members that add to mental suffering, particularly in the local setting where get-togethers with friends and families is a major source of entertainment [5]. Recent studies also showed that individuals who are following social distancing experience loneliness causing a substantial level of distress in the form of anxiety, stress, anger, misperception, and post-traumatic stress symptoms [4,

1  
2  
3 5]. In addition rumors, myths and inaccurate information about COVID-19 are also spreading  
4 rapidly with the widespread use of social media and is not only confined to adults but is also  
5 carried onto the children that also imposed mental distress [8].  
6  
7  
8  
9

10 The fear of transmitting disease or family member falling ill is a probable mental function of  
11 human nature, but at the same point, psychological fear of the disease generates more anxiety than  
12 the disease itself. Therefore, mental health problems are likely to increase in an epidemic situation  
13 among community members. Considering the relevance of all the above factors, we explored  
14 perceptions and attitudes of community members' towards the COVID-19 pandemic and its impact  
15 on their mental well-being.  
16  
17  
18  
19  
20  
21  
22

## 23 **METHODS**

### 24 **Study design and setting**

25  
26  
27  
28  
29 This study employed an exploratory qualitative research design using semi-structured interviews  
30 and a purposive sampling approach. The present study is being reported in reported in accordance  
31 with the reporting guidance provided in consolidated criteria for reporting qualitative research as  
32 seen in Additional file 1. The study was conducted in two communities of Karachi city. These  
33 included Karimabad Federal B Area Block 3 Gulberg Town, Garden East, and Garden West area  
34 of Karachi city. Karimabad is a neighborhood in the Karachi-central district of the Karachi,  
35 Pakistan. It is situated at the south of Gulberg Town bordering Liaquatabad, Gharibabad, and  
36 Federal B Area. The population of this neighborhood is predominantly Ismailis. Garden is an up  
37 market neighborhood, which is in the Karachi South district of Karachi, Pakistan. It is subdivided  
38 into two neighborhoods: Garden East and Garden West. The population of Garden used to be  
39 primarily Ismaili and Goan Catholic but has seen increasing numbers of Memons, Pashtuns and  
40 Baloch.  
41  
42  
43  
44  
45  
46  
47  
48  
49  
50  
51  
52  
53  
54  
55  
56  
57  
58  
59  
60

## **Data Collection Methods and study participants**

The data collection methods for this formative research included in-depth interviews (IDIs) with community members. The aim of the IDIs is to explore community perceptions and attitudes, regarding the COVID-19 pandemic and its impact on their mental well-being. Adult community members of different ages and both genders who have not contracted the disease were purposively recruited from both sites, as mentioned in table 1. Participants who refused to give consent to participate in this study were excluded. Also, participants were excluded if they have been tested positive for COVID-19 or have been isolated/quarantined because of recent exposure

## **Data Collection Procedure**

Semi-structured interview guide was developed for community members to explore participants' views towards COVID-19 and understand their perceptions on the mental wellbeing in light of the current situation as mentioned in Additional file 2. The in-depth interviews (IDI) participants were identified and contacted via community WhatsApp group and email. Interviews were scheduled on participants' convenient day and time. Before beginning interview, the study investigators explained the study objectives and procedures to eligible community members. The consent of the eligible participants' was taken before the interview begins, in which participants agreed that the interview can be audio-recorded and written notes can be taken. Trained researchers conducted online qualitative interviews via zoom technology or Skype or WhatsApp call function. The interviews were conducted in either Urdu or English language and each interview lasted around 35 to 45 minutes in duration. Study participants were assured that their information remained confidential and no identifying features will be mentioned on the transcript.

## **Ethical considerations**

1  
2  
3 Ethical approval for this study was obtained from the Aga Khan University Ethical Review  
4  
5 Committee (AKU-ERC) [2020-4825-10599]. Written informed consent was obtained from the  
6  
7 study participants.  
8  
9

## 10 11 **Data analysis**

12  
13  
14 Study data was analyzed manually using the conventional thematic analysis technique[9]. Firstly,  
15  
16 the audio recordings from the interviews were transcribed and then translated into English  
17  
18 language. No identifying characteristics were included in the transcriptions. Transcripts were read  
19  
20 several times by four research investigators to develop an interpretation of the community  
21  
22 perceptions regarding COVID-19 pandemic and its impact on their mental health. This involved an  
23  
24 iterative process where data were coded, compared, contrasted, and refined to generate emergent  
25  
26 themes. The transcribed text was divided into ‘meaning units’ which was later shortened and  
27  
28 labeled with a ‘code’ without losing the study context. Codes were then analyzed and grouped into  
29  
30 similar categories. In the final step, similar categories were assembled under sub-themes and main  
31  
32 themes. Two independent investigators performed the coding, and category creation, and  
33  
34 discrepancies were resolved through discussion until a consensus was reached.  
35  
36  
37  
38  
39  
40

## 41 **RESULTS**

42  
43  
44 In this qualitative study, 27 IDIs were conducted, between May and June 2020, with a variety of  
45  
46 community members including, young adults, middle-age adults, and older adults of both genders.  
47  
48 Data collection was ceased once saturation was achieved. Out of total 30 participants, (n=27) were  
49  
50 agreed to participate in the study. The demographic information for the IDIs participants are  
51  
52 illustrated in Table 2.  
53  
54  
55  
56  
57  
58  
59  
60

1  
2  
3 Based on the data collection and thematic analysis, three overarching themes were identified (I)  
4 Impact of COVID-19 on mental health of the general communities; (II) Current coping  
5 mechanisms to adapt to the new reality; and (III) Recommendations to address mental health of  
6 communities. The themes and categories are presented in Table 3.  
7  
8  
9  
10  
11  
12

### 13 **Themes 1: Impact of COVID-19 on mental health of the general communities**

#### 14 **Increased anxiety and fear:**

15  
16  
17 Community members shared that the perceived\_unpredictability associated with COVID-19 has  
18 created stress and fear among individuals. Few community people verbalized that explaining and  
19 dealing with children's question about the current outbreak has further added anxiety in these  
20 difficult times. Some community people shared their concerns that closure of school has led to  
21 disruption in learning of children which may have induced anxiety among parents. These all  
22 worries and fears have led to a sense of unpredictability about the future, and life after pandemic.  
23  
24  
25  
26  
27  
28  
29  
30  
31  
32  
33  
34 Highlighting these points, a respondent stated:

35  
36  
37 *“Obviously there is so much uncertainty about the future ... when this will end? How many people*  
38 *will die? How world will look after this pandemic?”(IDI-16)*  
39  
40  
41

42  
43 Another fear that community people stated was the lack of adherence to precautionary measures,  
44 which may result in rapid transmission of virus leading to increase number of cases and loss of  
45 lives. Some participants also expressed that being more meticulous in complying with all safety  
46 measures against COVID-19 has raised their frustration and stress level. Similar thought is  
47 discussed by a respondent:  
48  
49  
50  
51  
52  
53  
54  
55  
56  
57  
58  
59  
60

1  
2  
3 *“Even if you go to the grocery shop you need to be extra careful about wearing masks,*  
4 *maintaining distance, cleaning hands ... which add to the stress...On the other hand, other people*  
5 *are not following any measures which can eventually get us into trouble”.* (IDI-20)  
6  
7  
8  
9

10  
11 While, some community members pointed out that they are frightened or scared because currently  
12 there is no treatment or vaccine against COVID-19 to control its rapid transmission. Few  
13 community individuals also shared that irrespective of disease exposure, they experience dread and  
14 anxiety from falling sick and tend to feel false symptoms of disease within them as one participant  
15 verbalized:  
16  
17  
18  
19  
20  
21  
22

23 *“If you get little flu or a sneeze, it strikes your mind towards COVID-19 symptoms. Even on little*  
24 *body ache...one feels like having COVID-19 symptoms”.* (IDI-19)  
25  
26  
27  
28

29 Further, some community members related their fear and anxiety with their risk of getting  
30 infection from workplace and transmitting it to their families, particularly elderly, children or  
31 people with compromised immune function. Some community people also voiced their concern  
32 that many private hospitals have been unable to accept and manage new COVID-19 patients which  
33 also induces a panic situation among community members. Expressing similar concerns, a  
34 participant revealed:  
35  
36  
37  
38  
39  
40  
41  
42

43 *“I am scared about my family ... My father is a chronic kidney patient; his immunity is very low.*  
44 *There is a fear that if he will get infected ...Will there be any space in the hospital. Further, how*  
45 *he would go through the entire process as he is already immune-compromised... So, there is a fear*  
46 *of losing my father or losing any other family member”* (IDI-25)  
47  
48  
49  
50  
51  
52  
53

54 **Financial hardship amid COVID-19 affecting psychological health:**  
55  
56  
57  
58  
59  
60

1  
2  
3 Many community members mentioned that the current pandemic has affected the global economy  
4 which will undoubtedly lead to financial losses impacting individuals financially, mostly daily  
5 wages workers. Dialogue with the community people indicated that their business is either on hold  
6 or concluded due to which individuals face difficulty in making their ends meet. Some of the  
7 community individuals also revealed that they faced layoffs or salary deductions in these  
8 challenging times. This has eventually affected the economic conditions of the family and they  
9 stated that they will have to start over again to get settled in their lives. Highlighting these points, a  
10 respondent stated:  
11  
12  
13  
14  
15  
16  
17  
18  
19  
20  
21

22  
23 *“We have a garment shop and we thought to earn well in Ramadan. But due to COVID-19, the*  
24 *shop was totally closed and we were not able to earn even during the peak time. It seems that we*  
25 *would have to wait for a year to get back to the normal routine”. (IDI-17)*  
26  
27  
28  
29

30 Moreover, the financial hardships related with pandemic has translated into widespread emotional  
31 distress and increased risk for psychiatric condition. Similar, comments on the experience of  
32 mental distress is discussed by a participant:  
33  
34  
35  
36  
37

38  
39 *“Many people have lost their jobs...no money to buy grocery and to run house...These people are*  
40 *suffering from anxiety, and depression. I have heard that few people have attempted suicide*  
41 *because they have no money to survive in this world” (IDI-5)*  
42  
43  
44  
45

#### 46 **Restrictions to routine religious practices affecting mental health:**

47  
48

49 A number of mass prayers and gatherings in religious places are prohibited that was the source of  
50 internal satisfaction and get-together for many individuals, resulting in mental sufferings among  
51 community people. Community members verbalized that they used to spend their quality time in  
52  
53  
54  
55  
56  
57  
58  
59  
60

1  
2  
3 the prayer hall to gain strength and positive energy. Highlighting this point, a respondent  
4 verbalized  
5  
6

7  
8  
9 *“I miss my prayer hall (Jamah Khana). Closure of prayer hall has been very difficult as there is*  
10 *feeling of incompleteness and dissatisfaction” (IDI-11)*  
11  
12

13  
14 During interviews, many community members also gave insight regarding traditional burial and  
15 funeral practices that has been halted due to COVID-19. They shared their concerns that burial  
16 practices such as ritual wash (ghusl), shrouding/covering the body (kafan), and funeral prayers  
17 could not be performed for the deceased in the current situation. Further, they shared that they are  
18 unable to counsel and provide moral support to the bereaved family members. This has heightened  
19 their fear and anxiety level and they are scared of dying in this way. This point was illustrated by a  
20 respondent who stated:  
21  
22  
23  
24  
25  
26  
27  
28  
29

30  
31 *“I have observed that ritual wash is not given to the death body because of the current situation. I*  
32 *don't want to die like this. I believe burial practices and rituals are so much necessary for the*  
33 *deceased. (IDI-11)*  
34  
35  
36  
37  
38

### 39 **Effects of media on emotions:**

40

41  
42 Community members mentioned that there is no source of entertainment because all types of  
43 media are currently displaying information related to COVID-19 pandemic. Majority of the  
44 community members shared that they are uncertain about the source and authenticity of  
45 information provided by the media. Highlighting this view, a participant expressed:  
46  
47  
48  
49  
50  
51  
52  
53  
54  
55  
56  
57  
58  
59  
60



1  
2  
3 *“Media has a negative effect. News headlines appearing in red color make us aggressive and*  
4 *anxious as red color affects our brain area. Moreover, there are many political issues in our state*  
5 *due to which media news is unauthentic and I don’t rely on it” (IDI-17)*  
6  
7

8  
9  
10  
11 Many individuals shared that the repeated media exposure about COVID-19 has enhanced their  
12  
13 psychological distress. They are overwhelmed with misinformation and rumors which impaired  
14  
15 their concentration and daily functioning. During the interviews, a community participant shared:  
16  
17

18  
19 *“Media has negatively affected us. Media such as news channel has a devastated impact on*  
20 *everyone particularly senior citizens who are at home. If I talk about my mother in law, she keeps*  
21 *on watching news and that has disturbed her so much. She is not coming out of this trauma*  
22 *(COVID-19)..... She is not even coming out of her bed or not even meeting anyone due to the*  
23 *influence of media” (IDI-4)*  
24  
25  
26  
27  
28  
29  
30

31 Some community people notified that media can work positively on a larger scale to nurture  
32  
33 community well-being but unfortunately no such direction has been witnessed from their end.

34 Many community members reported that they are avoiding mass media use to promote their  
35  
36 mental wellbeing and to remain mentally stable. Highlighting this view a participant expressed:  
37  
38  
39

40  
41  
42 *“I don’t watch news on media otherwise I will suffer from depression. It is important that we don’t*  
43 *watch news and take care of ourselves” (IDI-14)*  
44  
45  
46

#### 47 **Effects of social isolation on temperament, feelings and emotions:**

48  
49

50 Community members highlighted that the major repercussion of the COVID-19 outbreak is a  
51  
52 restriction on socialization. The lack of social interaction has substantially influenced the behavior  
53  
54 of people. This is evident by greater psychological distress in the form of anxiety, anger, and  
55  
56  
57  
58  
59  
60

1  
2  
3 irritability that results in increased disputes and domestic violence within the families. Similar  
4  
5 feelings revealed by the participant:  
6  
7

8  
9 *“Physical connection has been broken down from relatives and friends. Overall, everyone has*  
10  
11 *become irritable even on minor issues because one cannot go out, vent out their feelings, and meet*  
12  
13 *friends. This has resulted in disputes within the family on small concerns”.* (IDI-2)  
14  
15

16  
17 Few people also expressed that working from home is another challenge as you have to show 24/7  
18  
19 availability. This has increased their burden and caused agitation as they find difficulty in  
20  
21 balancing their work and home life together. Some participants also verbalized that their fears and  
22  
23 increased agitation have resulted in sleep disruptions and restlessness. Highlighting this view a  
24  
25 participant expressed:  
26  
27

28  
29 *“Work from home is another stressful thing for me in this pandemic because there is no time limit.*  
30  
31 *Usually, after office hours we are not responsible for any task or to respond back...But now days*  
32  
33 *we have to show our availability every time... even on weekends”.* (IDI-2)  
34  
35  
36

## 37 **Theme 2: Current coping mechanisms to adapt to the new reality**

### 38

### 39

### 40 **Getting closer to God amid COVID-19**

### 41

### 42

43  
44 A fundamental element in adjusting with these detrimental circumstances is coping. Each  
45  
46 individual in the community found their own coping mechanism to deal with COVID-19  
47  
48 pandemic. Majority of the community members shared that in the midst of these challenging times  
49  
50 they have come closer to God by spending more time in praying and being connected with  
51  
52 supreme power. Few community individuals also expressed that religion and faith give them  
53  
54  
55  
56  
57  
58  
59  
60

1  
2  
3 strength, and hope to manage current stressful situation. Highlighting this thought a participant  
4 discussed:  
5

6  
7  
8  
9 *“People should come closer to their religion. If they will timely perform their prayers then it will*  
10 *automatically reduce more than half of their stress and anxiety” (IDI-22)*  
11  
12

### 13 14 **Connecting with community members, friends, and relatives:** 15

16  
17 Social-isolation is an unusual experience for an individual however, supportive environment by the  
18 family play a crucial role to cope during the outbreak. Community members shared that lock down  
19 and social distancing has positive aspects as well; as families spend more time together. Spending  
20 quality time with family and relatives can bring sense of ease and comfort. Further, during these  
21 unprecedented times, many families reported use of online technologies to interact with other  
22 relatives and friends. Expressing similar thoughts, a participant verbalized:  
23  
24  
25  
26  
27  
28  
29  
30

31  
32 *“In these times, families should get united .....Positive point is that people, who were unable to*  
33 *spend time with their family, are now spending quality time with family. Due to COVID-19, we are*  
34 *sitting together, avoiding mobile phones and doing table talk. Before COVID-19, I was connected*  
35 *with the world. But I had no idea what is happening at my home. COVID-19 has brought this*  
36 *positive change in life” (IDI-17)*  
37  
38  
39  
40  
41  
42  
43  
44

### 45 **Resetting lives amid COVID-19:** 46

47  
48 Some of the respondents verbalized that setting up a daily routine like indulging in house-hold  
49 chores (cleaning and cooking) helped them to spend their time productively. Others highlighted  
50 that they spent time on hobbies such as, reading, writing, listening to music, and singing,  
51 photography, playing indoor games, performing home workouts (exercises and yoga) to stay active  
52  
53  
54  
55  
56  
57  
58  
59  
60

1  
2  
3 and motivated. While, some of the individuals utilized their time effectively in distance learning  
4 courses and gaining new skills. A participant shared:

5  
6  
7  
8  
9 *“Now a day, I am doing a lot of activities with my daughter. We are doing art work (painting) and*  
10 *learning new kinds of painting. I and my daughter have also learned baking in this lockdown*  
11 *period. Other than that, we are playing different games such as Ludo to keep ourselves busy”*

12  
13  
14  
15  
16 (IDI-3)

### 17 18 19 **Participating in mental health programs:**

20  
21  
22 During these difficult times when there is deluge of information on COVID-19, community  
23 members stated that there is need to divert their minds by planning strategies and programs that  
24 promote their mental wellbeing. Some community people shared that in order to overcome anxiety,  
25 fear and stress in this pandemic, mental health programs are initiated by some community leaders  
26 and volunteers. These programs were reported to be useful as they guide people to cope in a  
27 positive way and are very helpful for those who are depressed and anxious. Highlighting these  
28 views a community participant verbalized:

29  
30  
31  
32  
33  
34  
35  
36  
37  
38  
39 *“Last Sunday, I attended a psychologist session on “Mindfulness journey to a peace full life”,*  
40 *organized by my community. It was a very good program that guided us on how to be positive. The*  
41 *session focused on issue of anxiety and stress in this pandemic situation. The session helped in*  
42 *developing a sense of optimism and broadening horizon of our perceptions. These different types*  
43 *of sessions are running in our community which are very helpful for us to cope in present time”*

44  
45  
46  
47  
48  
49  
50 (IDI-5)

### 51 52 53 54 **Theme 3: Recommendations to address mental health of communities**

### **Assessing mental health needs of communities**

Some community members shared that mental health issues are considered as taboo in our society and people usually avoid talking about it. In that regard, community people pointed out that it is fundamental to assess the mental health needs of the community to plan and design appropriate mental health services. Alongside some community members mentioned that these mental health programs will also be beneficial for the COVID-19 patients and their family members. Highlighting these points, a respondent stated:

*“I believe that if there will be any survey or study conducted to understand the effects of COVID-19 on general population ... The results of the survey will certainly reveal that COVID-19 has more effects on mental health as compared to the physiology of a person. Therefore, government should conduct the survey and identify the house holds that have mental health issues and should send flyers or brochures that help them in coping” (IDI-15)*

### **Delivering remote mental health interventions for elderly:**

Most of the community members expressed that the long-term impact of the pandemic would be stressful for every individual particularly elders who are vulnerable given their weaker immune systems. Some community members conveyed that the current pandemic has called upon great transformation in terms of delivering remote mental health services via using basic technologies such as the telephone, SMS, and radio. However, there is a lack of opportunities to monitor the psychosocial needs of elders and deliver support to them.

1  
2  
3 “There are different mental health programs and sessions which are organized by our Jamati  
4 institutions. But, we are not providing any mental health session for our mass population that is  
5 our senior citizens or elder people”. (IDI-2)  
6  
7  
8  
9

### 10 **Role of government to support mental health of communities:**

11  
12  
13  
14 During the interview, community members notified that the government is only providing  
15 awareness about COVID-19 and are not focusing on the psychological needs of the community  
16 members. Few community individuals also mentioned that no funding is allocated by the  
17 government to tackle the mental health challenges of the community in this outbreak. In this  
18 context, many community people recommended the need for quality mental health services from  
19 the government at the national and provincial levels. Expressing similar views, a participant  
20 mentioned:  
21  
22  
23  
24  
25  
26  
27  
28  
29

30  
31 “Government is not considering mental health issues. The government should start mental health  
32 programs which could include online counseling sessions or programs that could lighten the  
33 moods of the general population. They can also raise mental health awareness via talk shows or  
34 through any other activity...government can use media to raise awareness and conduct mental  
35 health programs” (IDI-7)  
36  
37  
38  
39  
40  
41  
42  
43

### 44 **DISCUSSION**

45  
46  
47 The aim of the current study was to explore perceptions and attitudes of community members  
48 towards the COVID-19 pandemic, and its impact on their mental well-being. The study was  
49 conducted about four months after the primary episode of the COVID-19 pandemic and two  
50 months after the virus hit Pakistan. The research highlighted the mental health challenges faced by  
51  
52  
53  
54  
55  
56  
57  
58  
59  
60

1  
2  
3 the community members in this unprecedented time, alongside strategies and future  
4  
5 recommendations to cope with the current crisis.  
6  
7

8  
9 The study findings revealed that community participants experienced the feeling of anxiety and  
10  
11 chaos due to the outbreak. The individuals' emotional reaction and sense of danger stemmed from  
12  
13 their concerns regarding their own health as well as their family members. However, strict  
14  
15 compliance on safety measures served as an additional stress on them. Community people were  
16  
17 fearful of the increasing number of cases and high mortality rate in the country due to lack of  
18  
19 adherence to precautionary measures. This, uncertainty of the pandemic progression and fears to  
20  
21 settle down their lives in this disaster caused more mental suffering on them. Recent studies  
22  
23 conducted in Italy and Iran also showed similar findings that fear of COVID-19 was considerably  
24  
25 associated with depression and anxiety [7, 10].  
26  
27  
28  
29

30  
31 One of the major repercussions of the COVID-19 outbreak is the social distancing and isolation  
32  
33 that have been widely implemented to counter the present crisis. The local government has limited  
34  
35 social mobility by employing diverse measures such as closure of schools, colleges' and  
36  
37 universities, banned on public gathering, religious places and unessential workplaces, restricting  
38  
39 public transportation, travels and limiting social contacts. This has eventually hampered an  
40  
41 individual's source of happiness, connectedness, and sense of internal satisfaction [11, 12]. Our  
42  
43 study findings showed that community members felt overwhelmed by staying at home and they  
44  
45 experienced frustration, agitation/anxiety, boredom, and loneliness due to lack of physical  
46  
47 interaction. A systematic review also reported an association between social isolation and  
48  
49 loneliness with impaired psychological well-being [5].  
50  
51  
52  
53  
54  
55  
56  
57  
58  
59  
60

1  
2  
3 The closure of prayer halls and prohibition of congregational funeral prayers during the COVID-19  
4 pandemic was another overwhelming concern for many community members. The study finding  
5 showed that community people were distressed as they were unable to bury their loved ones or  
6 counsel the deceased family members in accordance with their religious burial rites. This has  
7 raised the sense of shock, and pain among individuals in the society and they were scared of dying  
8 in such circumstances. Similar evidence was reported by Wallace et al., 2020, families that were  
9 unable to grieve in accordance with traditional funeral practices or being unable to attend a loved  
10 one's burial undergo a feeling of grief and sorrow [13]  
11  
12  
13  
14  
15  
16  
17  
18  
19  
20  
21

22 Our study found that the pandemic has caused significant financial disruption among the  
23 community members. It was identified that many families were struggling hard in the present time  
24 due to financial insecurities including unemployment, and salary deduction. This has caused  
25 increased anxiety and depression among families that leads to long-lasting negative mental health  
26 consequences. Emerging evidence also suggested similar findings that most of the study  
27 participants felt anxious about economic restraint throughout lockdown and nearly one-fourth  
28 suffered from depressive symptoms [3]. Further, in the light of the widening financial crisis and  
29 unpredictability surrounding this outbreak, suicidal attempts may emerge as one of the emerging  
30 threats among the community [14, 15].  
31  
32  
33  
34  
35  
36  
37  
38  
39  
40  
41  
42  
43

44 Interestingly, the COVID-19 has another challenge in present age of social media. Our study  
45 determined that community people being confined to four walls rely on diverse modes of media  
46 (electronic and print media, as well as social media) to receive up-to-date information but they  
47 often overloaded with false information and rumors. This overwhelming or exaggerated  
48 information from the media shaped the risk perception of community members that give rise to  
49 epidemic related emotion, creating fear, anxiety, and stress. The finding is consistent with the  
50  
51  
52  
53  
54  
55  
56  
57  
58  
59  
60



1  
2  
3 studies conducted in China, and India that also related increased frequency of media exposure  
4 with the higher anxiety level among the public [16, 17]. Furthermore, comparable finding is also  
5 witnessed with the previous outbreak [18].  
6  
7  
8  
9

10  
11 Although the COVID-19 illness in its first instance seems like a physical health crisis it has  
12 devastating repercussions on mental health. However, in this unstable condition, many individuals  
13 have adopted diverse lifestyle-related measures to cope with the circumstances and ease the  
14 suffering. Many community members took support from their religious practices and beliefs to  
15 cope in this stressful time. Literature also reported that community adults considered current  
16 stressful time as an opportunity to deepen their spiritual faith or personal connection with God  
17 through prayer, meditation and reciting scriptures that nurtures the soul [12].  
18  
19  
20  
21  
22  
23  
24  
25  
26  
27

28 Further many isolated individuals engaged themselves in diverse tasks or activities to live their  
29 best possible life. Many community members carried on their hobbies including painting, reading,  
30 writing, listening to music or motivational videos, singing, playing an instrument, cooking, and  
31 exercise and learning new skills via online courses to spend their spare time productively. This sort  
32 of behavioral activity helped to divert the mind of the person and create positive emotions that  
33 enable individuals to bounce back from negative feelings and lessen their psychological distress  
34 [19]. Additionally, in the current situation, many families got a chance to spend quality time with  
35 each other that brought harmony and positivity within them. This finding is also consistent with  
36 the literature [20]  
37  
38  
39  
40  
41  
42  
43  
44  
45  
46  
47  
48  
49

50 The study finding revealed that the community leaders and volunteers organized different mental  
51 health sessions for community people through online medium. These sessions are essential during  
52 pandemics as they helped to reduce mental suffering and promoted adaptive coping strategies.  
53  
54  
55  
56  
57  
58  
59  
60

1  
2  
3 However, participants also notified that there is a lack of provision of mental health services for  
4 elderly who lived alone and are now being forced to stay in their homes. Evidence also suggests  
5 that vulnerable groups including elders are restricted to their households during the pandemic can  
6 have devastating mental health outcomes [21]. The participants also voiced their concerns that  
7 government officials are not providing any psychological services to the community on a larger  
8 scale.  
9

10  
11 In this regard, our study also reported some recommendations to address the mental health needs  
12 of the communities. Community participants suggested the need of developing mental health  
13 assessment tools along with need-based interventions at the national and provincial levels to  
14 mitigate long-lasting mental health effects. WHO has also emphasized taking the essential  
15 provisions to deal with the psychological consequences of COVID-19 [22]. Our study participants  
16 suggested the need for remote mental health programs for the entire community particularly elders  
17 via using basic technologies such as the telephone, SMS, and radio. As mentioned by Ho et al.,  
18 2020 in this period of innovation, healthcare services can provide remote psychological support  
19 services for communities that are affected by the COVID-19[11]. The present study also suggested  
20 the need for psychological help lines for mental health counseling related to COVID-19. Recently,  
21 the government of India has introduced helpline numbers to deliver guidance and counseling  
22 services. Therefore, as suggested by our study that allocation of proper funding by the government  
23 is pivotal to provide quality mental health services.  
24  
25  
26  
27  
28  
29  
30  
31  
32  
33  
34  
35  
36  
37  
38  
39  
40  
41  
42  
43  
44  
45  
46  
47  
48

## 49 **STRENGTH AND LIMITATIONS**

50  
51  
52 This is one of the few studies that have explored community perception regarding COVID-19 and  
53 its impact on the mental well-being. This study has some limitations. Given the nature of the  
54  
55  
56  
57  
58  
59  
60

1  
2  
3 disease, all interviews were conducted online so the researcher was unable to capture the non-  
4 verbal cues of participants. Besides, the researcher was unable to perform focus group interviews  
5 which would have presented in-depth insight. Lastly, future studies are required to understand the  
6 psychological impact of this pandemic on the community across time.  
7  
8  
9  
10  
11

## 12 13 **CONCLUSION**

14  
15  
16 This study provides a detailed understanding of community experiences and diverse pandemic-  
17 related mental health challenges among young, middle, and older age adults. Moreover, the finding  
18 suggests that during the outbreak continuous support for psychosocial well-being in all age groups  
19 should be of utmost priority. Additionally, the current disruptive situation calls for the initiation of  
20 novel innovative opportunities to provide mental health facilities that foster effective utilization of  
21 available resources. The finding of this study guide the development of context-specific mental  
22 health programs to overcome the repercussions of the pandemic. These psychological interventions  
23 will not only be beneficial in the short term during the COVID-19 pandemic but could offer a long  
24 term advantage of strengthening the system.  
25  
26  
27  
28  
29  
30  
31  
32  
33  
34  
35  
36  
37  
38  
39  
40  
41  
42  
43  
44  
45  
46  
47  
48  
49  
50  
51  
52  
53  
54  
55  
56  
57  
58  
59  
60

## Abbreviations

IDI: In-depth Interviews, M: Male, F: Female

## Acknowledgments

The authors would like to thanks participants for their time.

## Authors' contributions

NA&ASF designed the study. ASF, NAA, NBA, RF, and SNM collected the data. NA&ASF analyzed and interpreted the data. NA wrote the first draft of the manuscript. ASF has given critical feedback. All authors contributed to reviewing and editing the manuscript.

## Funding

This research did not receive any specific grant from funding agencies in the public, commercial, or not-for-profit sectors.

## Availability of data and materials

The datasets was collected and analyzed and can be made available from the corresponding author on reasonable request.

## Ethics approval

Ethical approval for this study was obtained from the Aga Khan University Ethical Review Committee (AKU-ERC) [2020-4825-10599].

## Consent for publication

Written informed consent for publication was obtained.

## Competing interests

The authors declare that they have no competing interests.

## References:

1. WHO, *World Health Organization. Mental health and psychosocial considerations during the COVID-19 outbreak, 18 March 2020.* . 2020.
2. Ebrahim, S.H., et al., *Covid-19 and community mitigation strategies in a pandemic.* 2020, British Medical Journal Publishing Group.
3. Chakraborty, K. and M. Chatterjee, *Psychological impact of COVID-19 pandemic on general population in West Bengal: A cross-sectional study.* Indian Journal of Psychiatry, 2020. **62**(3): p. 266.
4. Zhou, X., et al., *The Role of Telehealth in Reducing the Mental Health Burden from COVID-19.* Telemedicine and e-Health, 2020.
5. Brooks, S.K., et al., *The psychological impact of quarantine and how to reduce it: rapid review of the evidence.* The Lancet, 2020.
6. Van Weel, C., et al., *Primary healthcare policy implementation in South Asia.* BMJ global health, 2016. **1**(2): p. e000057.
7. Soraci, P., et al., *Validation and psychometric evaluation of the Italian version of the Fear of COVID-19 Scale.* International Journal of Mental Health and Addiction, 2020: p. 1-10.
8. Kumar, A. and K.R. Nayar, *COVID 19 and its mental health consequences.* Journal of Mental Health, 2020: p. 1-2.
9. Vaismoradi, M., H. Turunen, and T. Bondas, *Content analysis and thematic analysis: Implications for conducting a qualitative descriptive study.* Nursing & health sciences, 2013. **15**(3): p. 398-405.
10. Ahorsu, D.K., et al., *The fear of COVID-19 scale: development and initial validation.* International journal of mental health and addiction, 2020.
11. Ho, C.S., C.Y. Chee, and R.C. Ho, *Mental health strategies to combat the psychological impact of COVID-19 beyond paranoia and panic.* Ann Acad Med Singapore, 2020. **49**(1): p. 1-3.
12. Koenig, H.G., *Ways of protecting religious older adults from the consequences of COVID-19.* The American Journal of Geriatric Psychiatry, 2020.
13. Wallace, C.L., et al., *Grief during the COVID-19 pandemic: considerations for palliative care providers.* Journal of Pain and Symptom Management, 2020.
14. Lee, S.A., *Coronavirus Anxiety Scale: A brief mental health screener for COVID-19 related anxiety.* Death studies, 2020. **44**(7): p. 393-401.
15. Mamun, M.A. and I. Ullah, *COVID-19 suicides in Pakistan, dying off not COVID-19 fear but poverty?—The forthcoming economic challenges for a developing country.* Brain, behavior, and immunity, 2020.
16. Gao, J., et al., *Mental health problems and social media exposure during COVID-19 outbreak.* Plos one, 2020. **15**(4): p. e0231924.
17. Suryawanshi, R. and V. More, *A study of effect of Corona Virus Covid-19 and lock down on human psychology of Pune City region.* Studies in Indian Place Names, 2020. **40**(70): p. 984-994.
18. Choi, D.-H., et al., *The impact of social media on risk perceptions during the MERS outbreak in South Korea.* Computers in Human Behavior, 2017. **72**: p. 422-431.
19. Polizzi, C., S.J. Lynn, and A. Perry, *STRESS AND COPING IN THE TIME OF COVID-19: PATHWAYS TO RESILIENCE AND RECOVERY.* Clinical Neuropsychiatry, 2020. **17**(2).
20. Kar, S.K., et al., *Coping with mental health challenges during COVID-19, in Coronavirus Disease 2019 (COVID-19).* 2020, Springer. p. 199-213.
21. Armitage, R. and L.B. Nellums, *COVID-19 and the consequences of isolating the elderly.* The Lancet Public Health, 2020. **5**(5): p. e256.
22. Yao, H., J.-H. Chen, and Y.-F. Xu, *Rethinking online mental health services in China during the COVID-19 epidemic.* Asian journal of psychiatry, 2020. **50**: p. 102015.

**Table 1 Study participants for In-depth Interviews**

| <b>In-depth interview Participants</b> | <b>Total IDIs= 27</b> | <b>Male (M)=12; Female (F)=14</b> |
|----------------------------------------|-----------------------|-----------------------------------|
| Young adults (18 -35 years)            | 12                    | Male=6; Female=6                  |
| Middle-aged adults (36-55 years)       | 8                     | Male=4; Female=4                  |
| Older adults (> 55 years)              | 7                     | Male=3; Female=4                  |

**Table 2: Characteristics of In-depth Interview (IDI) Study Participants (IDI=27)**

| <b>Characteristics of participants (n=27)</b> |               | <b>n(%) or mean <math>\pm</math> SD</b> |
|-----------------------------------------------|---------------|-----------------------------------------|
| Gender                                        | Female        | 14 (52.0%)                              |
|                                               | Male          | 13 (48.0%)                              |
| Age                                           |               | 39.6 $\pm$ 13.9                         |
| Education level                               | Matriculate   | 1 (4.0 %)                               |
|                                               | Intermediate  | 4 (15.0%)                               |
|                                               | Bachelors     | 13 (48.0%)                              |
|                                               | Masters       | 9 (33.0%)                               |
| Occupation                                    | Private Job   | 15 (56.0%)                              |
|                                               | Self-employed | 3 (11.0%)                               |
|                                               | Home maker    | 6 (22.0%)                               |
|                                               | Student       | 2 (7.0%)                                |
|                                               | Retired       | 1 (4.0%)                                |

**Table 3: Themes and categories**

| <b>Themes</b>                                                  | <b>Categories</b>                                                                                                                                                                                                                                                                                                                                                       |
|----------------------------------------------------------------|-------------------------------------------------------------------------------------------------------------------------------------------------------------------------------------------------------------------------------------------------------------------------------------------------------------------------------------------------------------------------|
| Impact of COVID-19 on mental health of the general communities | <ul style="list-style-type: none"> <li>• Increased anxiety and fear</li> <li>• Financial hardship amid COVID-19 adversely affecting psychological health</li> <li>• Restrictions to routine religious practices affecting mental health</li> <li>• Effects of media on emotions</li> <li>• Effects of social isolation on temperament, feelings and emotions</li> </ul> |
| Current coping mechanisms to adapt to the new reality          | <ul style="list-style-type: none"> <li>• Getting closer to God amid COVID-19</li> <li>• Connecting online with community members, friends, and relatives</li> <li>• Resetting lives amid COVID-19</li> </ul>                                                                                                                                                            |

1  
2  
3  
4  
5  
6  
7  
8  
9  
10  
11  
12  
13  
14  
15  
16  
17  
18  
19  
20  
21  
22  
23  
24  
25  
26  
27  
28  
29  
30  
31  
32  
33  
34  
35  
36  
37  
38  
39  
40  
41  
42  
43  
44  
45  
46  
47  
48  
49  
50  
51  
52  
53  
54  
55  
56  
57  
58  
59  
60

|                                                         |                                                                                                                                                                                                                                         |
|---------------------------------------------------------|-----------------------------------------------------------------------------------------------------------------------------------------------------------------------------------------------------------------------------------------|
|                                                         | <ul style="list-style-type: none"><li>• Participating in mental health programs</li></ul>                                                                                                                                               |
| Recommendations to address mental health of communities | <ul style="list-style-type: none"><li>• Assessing mental health needs of communities</li><li>• Delivering remote mental health interventions for elderly</li><li>• Role of government to support mental health of communities</li></ul> |

For peer review only

**Supplementary Material:**

Additional file 1: COREQ 32--ITEM CHECKLIST

| No. Item                                       | Guide questions/description                                            | Reported on Page #                                                             |
|------------------------------------------------|------------------------------------------------------------------------|--------------------------------------------------------------------------------|
| <b>Domain 1: Research team and reflexivity</b> |                                                                        |                                                                                |
| 1. Inter viewer/facilitator                    | Which author/s conducted the interview?                                | Page # 7 (Data Collection Procedure)                                           |
| 2. Credentials                                 | What were the researcher's credentials?                                | Page # 7 (Data Collection Procedure)                                           |
| 3. Occupation                                  | What was their occupation at the time of the study?                    | Page # 7 (Data Collection Procedure)                                           |
| 4. Gender                                      | Was the researcher male or female?                                     | Page # 7 (Data Collection Procedure)                                           |
| 5. Experience and training                     | What experience or training did the researcher have?                   | Page # 7 (Data Collection Procedure)                                           |
| 6. Relationship with participants established  | Was a relationship established prior to study commencement?            | Page # 7 (Data Collection Procedure)                                           |
| 7. Participant knowledge of the interviewer    | What did the participants know about the researcher?                   | Page # 7 (Data Collection Procedure)                                           |
| 8. Interviewer characteristics                 | What characteristics were reported about the inter viewer/facilitator? | Page # 7 (Data Collection Procedure)                                           |
| <b>Domain 2: study design</b>                  |                                                                        |                                                                                |
| 9. Methodological orientation and Theory       | What methodological orientation was stated to underpin the study?      | NA                                                                             |
| 10. Sampling                                   | How were participants selected?                                        | Page # 7 (Data Collection Methods and study participants)                      |
| 11. Method of approach                         | How were participants approached?                                      | Page # 7 (Data Collection Procedure)                                           |
| 12. Sample size                                | How many participants were in the study?                               | Page # 8 (Result)                                                              |
| 13. Non-participation                          | How many people refused to participate or dropped out? Reasons?        | Page # 8 (Result)                                                              |
| 14. Setting of data collection                 | Where was the data collected?                                          | Page # 7 (Data Collection Procedure)                                           |
| 15. Presence of non-participants               | Was anyone else present besides the participants and researchers?      | Page # 7 (Data Collection Procedure)                                           |
| 16. Description of sample                      | What are the important characteristics of the sample?                  | Page # 7; Table 1 (Data Collection Methods and study participants)             |
| 17. Interview guide                            | Were questions, prompts, guides provided by the authors?               | Additional file -2 In-Depth Interview Guide for interviewing community members |
| 18. Repeat interviews                          | Were repeat interviews carried out?                                    | No                                                                             |
| 19. Audio/visual recording                     | Did the research use audio or visual recording to collect the data?    | Page # 7 (Data Collection Procedure)                                           |
| 20. Field notes                                | Were field notes made during and/or                                    | Page # 7 (Data Collection Procedure)                                           |



|                                    |                                                                                                            |                                             |
|------------------------------------|------------------------------------------------------------------------------------------------------------|---------------------------------------------|
|                                    | after the interview?                                                                                       |                                             |
| 21. Duration                       | What was the duration of the interviews                                                                    | Page # 7 (Data Collection Procedure)        |
| 22. Data saturation                | Was data saturation discussed?                                                                             | Page # 8 (Result)                           |
| 23. Transcripts returned           | Were transcripts returned to participants for comment and/or correction?                                   | No                                          |
| Domain 3: analysis and findings    |                                                                                                            |                                             |
| 24. Number of data coders          | How many data coders coded the data?                                                                       | Page # 8 (Data Analysis)                    |
| 25. Description of the coding tree | Did authors provide a description of the coding tree?                                                      | NA                                          |
| 26. Derivation of themes           | Were themes identified in advance or derived from the data?                                                | Page # 8 & 9 (Result)                       |
| 27. Software                       | What software, if applicable, was used to manage the data?                                                 | No (manually done) Page # 8 (Data Analysis) |
| 28. Participant checking           | Did participants provide feedback on the findings?                                                         | No                                          |
| 29. Quotations presented           | Were participant quotations presented to illustrate the themes/findings?<br>Was each quotation identified? | Page # 9-17 (Results)                       |
| 30. Data and findings consistent   | Was there consistency between the data presented and the findings?                                         | Page # 9-17 (Results)                       |
| 31. Clarity of major themes        | Were major themes clearly presented in the findings?                                                       | Page # 9-17 (Results)                       |
| 32. Clarity of minor themes        | Is there a description of diverse cases or discussion of minor themes?                                     | Page # 9-17 (Results)                       |

Additional file -2  
In-Depth Interview Guide for interviewing community members

Basic Information

| S.no | Name<br>(Confidential) | Age | Sex | Occupation | Educational<br>level | Locality/site |
|------|------------------------|-----|-----|------------|----------------------|---------------|
|      |                        |     |     |            |                      |               |
|      |                        |     |     |            |                      |               |
|      |                        |     |     |            |                      |               |
|      |                        |     |     |            |                      |               |
|      |                        |     |     |            |                      |               |
|      |                        |     |     |            |                      |               |
|      |                        |     |     |            |                      |               |

**General Perception sand knowledge about COVID-19**

1. How do you feel about your knowledge level regarding COVID-19 pandemic?
2. How did you learn about the coronavirus outbreak?
3. What is the reliable source of information about COVID-19?

Probes: social media, television, newspapers/magazines, websites, friends/family, health care professionals

4. What were your initial reactions towards COVID-19, when you first heard about it?
  - a. Probes: curse from God etc.
5. What are your thoughts and feelings about COVID-19 cases?

**Perceptions on safety measures for preventing COVID-19**

1. What safety measures have you taken for yourself and for your family safety in COVID-19?

**Probes:** hand washing, sanitizer, social distancing, covering your cough, avoiding touching your eyes, nose, and mouth with unwashed hands, wearing a face mask, avoiding close contact with someone who is sick

2. Do you think novel coronavirus will inflict serious damage in your community, if adequate safety measures are not taken?
3. Do you think you can protect yourself against the novel coronavirus?

For peer review only - <http://bmjopen.bmj.com/site/about/guidelines.xhtml>

**Perception about fears, anxiety stress and coping about COVID-19**

1. How you perceive life during the COVID- pandemic?
  - a. Probes: affected daily routine
2. What are your fears and anxieties related to COVID-19?
3. What are the mental health consequences of the COVID-19 lockdown and social isolation you and your family?
4. How the current pandemic has caused stress in life's of people and it has also dramatically affected you and your family? (financial glitches, disputes, jobs)
5. How COVID-19 has influenced your temperament, feelings and emotions?
6. What is the effect of repeated media consumption about COVID-19 in traditional and social media on mental health?
7. How do you cope with anxiety and fear related to COVID-19 pandemic?
8. Do you feel the need of having mental health programs or other measures to overcome anxiety, fear and stress in this pandemic situation?
9. Do you have any suggestions on how government could provide support services for coping with stress related to this crisis situation? (Coping strategies)
10. Currently, what sort of help or support is accessible to you and your family to cope with the pandemic situation?
11. What are the best methods for promoting successful adherence to behavioral advice about COVID-19 while enabling mental wellbeing and minimizing distress?

### **Future Preparedness**

1. In your opinion, what are the needs for future preparedness for any outbreak that prepare community (trainings, awareness, equipment, protective gears)

**Supplementary Material:**

## Additional file 1: COREQ 32---ITEM CHECKLIST

| No. Item                                       | Guide questions/description                                           | Reported on Page #                                        |
|------------------------------------------------|-----------------------------------------------------------------------|-----------------------------------------------------------|
| <b>Domain 1: Research team and reflexivity</b> |                                                                       |                                                           |
| 1. Interviewer/facilitator                     | Which author/s conducted the interview?                               | Page # 7 (Data Collection Procedure)                      |
| 2. Credentials                                 | What were the researcher's credentials?                               | Page # 7 (Data Collection Procedure)                      |
| 3. Occupation                                  | What was their occupation at the time of the study?                   | Page # 7 (Data Collection Procedure)                      |
| 4. Gender                                      | Was the researcher male or female?                                    | Page # 7 (Data Collection Procedure)                      |
| 5. Experience and training                     | What experience or training did the researcher have?                  | Page # 7 (Data Collection Procedure)                      |
| 6. Relationship with participants established  | Was a relationship established prior to study commencement?           | Page # 7 (Data Collection Procedure)                      |
| 7. Participant knowledge of the interviewer    | What did the participants know about the researcher?                  | Page # 7 (Data Collection Procedure)                      |
| 8. Interviewer characteristics                 | What characteristics were reported about the interviewer/facilitator? | Page # 7 (Data Collection Procedure)                      |
| <b>Domain 2: study design</b>                  |                                                                       |                                                           |
| 9. Methodological orientation and Theory       | What methodological orientation was stated to underpin the study?     | NA                                                        |
| 10. Sampling                                   | How were participants selected?                                       | Page # 7 (Data Collection Methods and study participants) |
| 11. Method of approach                         | How were participants approached?                                     | Page # 7 (Data Collection Procedure)                      |

|                                    |                                                                     |                                                                                |
|------------------------------------|---------------------------------------------------------------------|--------------------------------------------------------------------------------|
| 12. Sample size                    | How many participants were in the study?                            | Page # 8 (Result)                                                              |
| 13. Non---participation            | How many people refused to participate or dropped out? Reasons?     | Page # 8 (Result)                                                              |
| 14. Setting of data collection     | Where was the data collected?                                       | Page # 7 (Data Collection Procedure)                                           |
| 15. Presence of non---participants | Was anyone else present besides the participants and researchers?   | Page # 7 (Data Collection Procedure)                                           |
| 16. Description of sample          | What are the important characteristics of the sample?               | Page # 7; Table 1 (Data Collection Methods and study participants)             |
| 17. Interview guide                | Were questions, prompts, guides provided by the authors?            | Additional file -2 In-Depth Interview Guide for interviewing community members |
| 18. Repeat interviews              | Were repeat interviews carried out?                                 | No                                                                             |
| 19. Audio/visual recording         | Did the research use audio or visual recording to collect the data? | Page # 7 (Data Collection Procedure)                                           |
| 20. Field notes                    | Were field notes made during and/or                                 | Page # 7 (Data Collection Procedure)                                           |

|                                 |                                                                          |                                      |
|---------------------------------|--------------------------------------------------------------------------|--------------------------------------|
|                                 | after the interview?                                                     |                                      |
| 21. Duration                    | What was the duration of the interviews                                  | Page # 7 (Data Collection Procedure) |
| 22. Data saturation             | Was data saturation discussed?                                           | Page # 8 (Result)                    |
| 23. Transcripts returned        | Were transcripts returned to participants for comment and/or correction? | No                                   |
| Domain 3: analysis and findings |                                                                          |                                      |
| 24. Number of data coders       | How many data coders coded the data?                                     | Page # 8 (Data Analysis)             |

|                                    |                                                                                                         |                                             |
|------------------------------------|---------------------------------------------------------------------------------------------------------|---------------------------------------------|
| 25. Description of the coding tree | Did authors provide a description of the coding tree?                                                   | NA                                          |
| 26. Derivation of themes           | Were themes identified in advance or derived from the data?                                             | Page # 8 & 9 (Result)                       |
| 27. Software                       | What software, if applicable, was used to manage the data?                                              | No (manually done) Page # 8 (Data Analysis) |
| 28. Participant checking           | Did participants provide feedback on the findings?                                                      | No                                          |
| 29. Quotations presented           | Were participant quotations presented to illustrate the themes/findings? Was each quotation identified? | Page # 9-17 (Results)                       |
| 30. Data and findings consistent   | Was there consistency between the data presented and the findings?                                      | Page # 9-17 (Results)                       |
| 31. Clarity of major themes        | Were major themes clearly presented in the findings?                                                    | Page # 9-17 (Results)                       |
| 32. Clarity of minor themes        | Is there a description of diverse cases or discussion of minor themes?                                  | Page # 9-17 (Results)                       |

# BMJ Open

## When COVID-19 enters in a community setting: An exploratory qualitative study of community perspectives on COVID-19 affecting mental well-being

|                                 |                                                                                                                                                                                                                                                                                                                                           |
|---------------------------------|-------------------------------------------------------------------------------------------------------------------------------------------------------------------------------------------------------------------------------------------------------------------------------------------------------------------------------------------|
| Journal:                        | <i>BMJ Open</i>                                                                                                                                                                                                                                                                                                                           |
| Manuscript ID                   | bmjopen-2021-049851.R1                                                                                                                                                                                                                                                                                                                    |
| Article Type:                   | Original research                                                                                                                                                                                                                                                                                                                         |
| Date Submitted by the Author:   | 03-Apr-2021                                                                                                                                                                                                                                                                                                                               |
| Complete List of Authors:       | ali, naureen; The Aga Khan University, Feroz, Anam; Aga Khan University Akber Ali, Noshaba; Aga Khan University Feroz, Rida; Aga Khan University Institute for Educational Development Pakistan<br>Nazim Meghani, Salima; Aga Khan University, Community Health Sciences<br>Saleem, Sarah; Aga Khan University, Community Health Sciences |
| <b>Primary Subject Heading</b>: | Qualitative research                                                                                                                                                                                                                                                                                                                      |
| Secondary Subject Heading:      | Mental health, Qualitative research                                                                                                                                                                                                                                                                                                       |
| Keywords:                       | COVID-19, QUALITATIVE RESEARCH, MENTAL HEALTH                                                                                                                                                                                                                                                                                             |
|                                 |                                                                                                                                                                                                                                                                                                                                           |

SCHOLARONE™  
Manuscripts



I, the Submitting Author has the right to grant and does grant on behalf of all authors of the Work (as defined in the below author licence), an exclusive licence and/or a non-exclusive licence for contributions from authors who are: i) UK Crown employees; ii) where BMJ has agreed a CC-BY licence shall apply, and/or iii) in accordance with the terms applicable for US Federal Government officers or employees acting as part of their official duties; on a worldwide, perpetual, irrevocable, royalty-free basis to BMJ Publishing Group Ltd ("BMJ") its licensees and where the relevant Journal is co-owned by BMJ to the co-owners of the Journal, to publish the Work in this journal and any other BMJ products and to exploit all rights, as set out in our [licence](#).

The Submitting Author accepts and understands that any supply made under these terms is made by BMJ to the Submitting Author unless you are acting as an employee on behalf of your employer or a postgraduate student of an affiliated institution which is paying any applicable article publishing charge ("APC") for Open Access articles. Where the Submitting Author wishes to make the Work available on an Open Access basis (and intends to pay the relevant APC), the terms of reuse of such Open Access shall be governed by a Creative Commons licence – details of these licences and which [Creative Commons](#) licence will apply to this Work are set out in our licence referred to above.

Other than as permitted in any relevant BMJ Author's Self Archiving Policies, I confirm this Work has not been accepted for publication elsewhere, is not being considered for publication elsewhere and does not duplicate material already published. I confirm all authors consent to publication of this Work and authorise the granting of this licence.



1  
2  
3 **1 Paper title:**  
4

5 2 When COVID-19 enters in a community setting: An exploratory qualitative study of community  
6  
7 3 perspectives on COVID-19 affecting mental well-being.  
8  
9

10 **4 Author names:**  
11

- 12  
13 • Ms. Naureen Akber Ali<sup>1\*</sup> (NAA)  
14  
15 • Ms. Anam Shahil Feroz<sup>2</sup>(ASF)  
16  
17 • Ms. Noshaba Akber Ali<sup>3</sup>(NBA)  
18  
19 • Ms. Rida Feroz<sup>4</sup>(RF)  
20  
21 • Ms. Salima Nazim Meghani<sup>5</sup>(SNM)  
22  
23 • Dr Sarah Saleem<sup>6</sup>(SS)  
24  
25  
26

27 **11 Full institutional mailing addresses of all authors:**  
28

29 <sup>1</sup>The Aga Khan University – School of Nursing and Midwifery, Stadium Road, PO Box 3500, Karachi  
30  
31 74800, Pakistan  
32

33  
34 <sup>2,3,5,6</sup>The Aga Khan University – Department of Community Health Sciences, Stadium Road, PO Box  
35  
36 3500, Karachi 74800, Pakistan  
37

38 <sup>4</sup>Aga Khan University Institute for Educational Development, Karachi, Pakistan  
39  
40

41 **17 Email addresses:**  
42

- 43 • Ms. Naureen Akber Ali<sup>\*1</sup> - NAA – [naureenalimeghani@gmail.com](mailto:naureenalimeghani@gmail.com)  
44  
45 • Ms. Anam Shahil Feroz<sup>2</sup> - AF- [anam.sahyl@gmail.com](mailto:anam.sahyl@gmail.com)  
46  
47 • Ms. Noshaba Akber Ali<sup>3</sup>- NBA - [noshaba.akber07@gmail.com](mailto:noshaba.akber07@gmail.com)  
48  
49 • Ms. Rida Feroz<sup>4</sup> - RF - [ridah.feroz.mphil19@student.aku.edu](mailto:ridah.feroz.mphil19@student.aku.edu)  
50  
51 • Ms. Salima Nazim Meghani<sup>5</sup> - SNM - [salima.ratnani@gmail.com](mailto:salima.ratnani@gmail.com)  
52  
53 • Dr Sarah Saleem<sup>6</sup>- SS - [sarah.saleem@aku.edu](mailto:sarah.saleem@aku.edu)  
54  
55  
56  
57  
58  
59  
60

1  
2  
3  
4  
5  
6  
7  
8  
9  
10  
11  
12  
13  
14  
15  
16  
17  
18  
19  
20  
21  
22  
23  
24  
25  
26  
27  
28  
29  
30  
31  
32  
33  
34  
35  
36  
37  
38  
39  
40  
41  
42  
43  
44  
45  
46  
47  
48  
49  
50  
51  
52  
53  
54  
55  
56  
57  
58  
59  
60

1 **Corresponding author\*:**

- 2 • Ms. Naureen Akber Ali\*<sup>1</sup>-NAA - [naureenalimeghani@gmail.com](mailto:naureenalimeghani@gmail.com)

3 Postal Address: The Aga Khan University – School of Nursing and Midwifery, Stadium Road, PO  
4 Box 3500, Karachi 74800, Pakistan

5 Phone Number: 0213-4865282

6 **Keywords:** COVID-19, exploratory qualitative study, mental health, community, perceptions

7 **Word count:** 5650

8

For peer review only

1  
2  
3 **1 ABSTRACT:**  
4  
5

6 **2 Objective:**  
7  
8

9  
10 3 The COVID-19 pandemic has resulted in an increased level of anxiety and fear among the general  
11  
12 4 population related to its management and infection spread. Considering the relevance of present  
13  
14 5 circumstances, we explored perceptions and attitudes of community members towards their mental  
15  
16 6 well-being during the COVID-19 pandemic  
17

18  
19  
20 **7 Setting:**  
21  
22

23 8 We conducted an exploratory qualitative study using a purposive sampling approach, at two  
24  
25 9 communities of Karachi, Pakistan.  
26  
27

28  
29 **10 Participants:**  
30  
31

32 11 In-depth interviews were conducted with community members including, young adults, middle-aged  
33  
34 12 adults, and older adults of both genders. Study data were analyzed manually using the thematic  
35  
36 13 analysis technique.  
37  
38

39  
40 **14 Primary Outcome:**  
41  
42

43 15 The primary outcome is assessing community perception towards their mental well-being amidst the  
44  
45 16 COVID-19 pandemic.  
46  
47

48  
49 **17 Results:**  
50  
51

52 18 A total of 27 in-depth interviews were conducted, between May and June 2020. Three overarching  
53  
54 19 themes were identified: (I) Impact of COVID-19 on the mental health of the general communities; (II)  
55  
56 20 Current coping mechanisms to adapt to the new reality; and (III) Recommendations to address the  
57  
58

1  
2  
3 1 mental health of communities. Generally, community members underwent increased anxiety and fear  
4  
5 2 due to the contagious nature of the virus. Alongside, social, financial, and religious repercussions of  
6  
7 3 the pandemic have also heightened psychological distress among community members. However,  
8  
9 4 community members were able to point out some of the coping mechanisms such as getting closer to  
10  
11 5 God, connecting with family, participating in mental health sessions, and resetting lives by indulging  
12  
13 6 in diverse activities. Simultaneously, they also recommended the need for remote mental health  
14  
15 7 services for elders and continuous efforts by the government to address the mental health needs of the  
16  
17 8 community.  
18  
19  
20  
21

## 22 **Conclusion:**

23  
24  
25 10 COVID-19-associated mental health consequences have hit every individual in society. The study  
26  
27 11 finding has the potential to guide the development of context-specific innovative mental health  
28  
29 12 programs to overcome the pandemic repercussions.  
30  
31  
32

## 33 **Strengths and limitations of this study:**

- 34  
35  
36 14 • The mental health impact of the COVID-19 pandemic is likely to last much longer than the  
37  
38 15 physical health impact, and this study is positioned well to explore the perceptions and  
39  
40 16 attitudes of community members towards their mental well-being during the COVID-19  
41  
42 17 pandemic  
43  
44  
45 18 • This study will guide the development of context-specific innovative mental health programs  
46  
47 19 to support communities in the future.  
48  
49  
50 20 • To minimize the risk of infection all study respondents were interviewed online and hence the  
51  
52 21 authors did not have the opportunity to build rapport with the respondents or obtain non-verbal  
53  
54 22 cues during interviews.  
55  
56  
57 23

## 1 **BACKGROUND:**

2 The current outbreak of COVID-19 has been declared as a Public Health Emergency of International  
3 Concern by the World Health Organization (1). The pandemic has not only incurred massive  
4 challenges to the global supply chains and healthcare systems but also has a detrimental effect on the  
5 overall health of individuals (2). A systematic review finding also showed that high rates of  
6 psychological illnesses and symptoms were witnessed in the general population of both developed  
7 and developing world during the COVID-19 pandemic(3). The outbreak has led to lockdowns and has  
8 created a negative impact on the societies at large. Most company employees' including daily wage  
9 workers have been prohibited from accessing their workplaces or being asked to work from home  
10 which has caused job-related insecurities and financial crisis among the communities(4). A cross-  
11 sectional survey assessed the impact of income loss and social distancing on the quality of life. It was  
12 found that almost, 66.9% of the participants faced drastic loss in their household income due to  
13 COVID-19 pandemic. Besides, factors such as being female, having chronic diseases and living with  
14 family size of 3–5 people were related with lower health-related quality of life (HRQOL) scores (5).  
15 Alongside, educational institutions have been closed due to which students have lost their routine of  
16 studying and socializing with their peers (6). A study also identified that postgraduate students are  
17 associated with a higher level of stress, anxiety, and depression during COVID-19 lockdown (7).  
18 While parents have been struggling on creating a structured milieu for their children. COVID-19 has  
19 hindered the normal routine life of every individual be it children, teenager, adult, or the elderly which  
20 may cause florid mental distress(8). The crisis is engendering a burden throughout the population  
21 particularly in developing countries like Pakistan that face major challenges due to the fragile health  
22 care systems and poor economic structures (9).

23 The pandemic has resulted in an increased level of anxiety and fear among the general population  
24 related to its management and infection spread (10). Further, the highly contagious nature of the

1 COVID-19 has also escalated confusion, fear, and panic among the general population. Moreover,  
2 social distancing is often an unpleasant experience for the community members that adds to mental  
3 suffering, particularly in the local setting where get-togethers with friends and families is a major  
4 source of socializing (8). Recent studies also showed that individuals who are following social  
5 distancing experience loneliness causing a substantial level of distress in the form of anxiety, stress,  
6 anger, misperception, and post-traumatic stress symptoms (6, 8). Also, rumors, myths, and inaccurate  
7 information about COVID-19 are spreading rapidly with the widespread use of social media and are  
8 not only confined to adults but are also carried onto the children that also causes mental distress (11).  
9 Besides, adhering to all precautionary measures such as wearing mask and proper hand hygiene also  
10 serve as stressors for the community people. A cross-country study also showed that implementing  
11 precautionary measures (covering mouth during coughing and sneezing, wearing a face mask, and  
12 hand hygiene) was one of the strongest risk factors of psychological distress among Poland community  
13 people (12).

14 Mental distress related to the COVID-19 pandemic has been widely witnessed across the globe. The  
15 massive lockdown is imposing panic, stress, anxiety, fears, and financial insecurities within societies.  
16 With the advent of this pandemic in Pakistan, people are restricted at home and are undergoing  
17 physical and mental suffering. Moreover, the fear of transmitting disease or family member falling ill  
18 is a probable mental function of human nature, but at the same point, psychological fear of the disease  
19 generates more anxiety than the disease itself. Therefore, mental health problems are likely to increase  
20 in a pandemic situation, and a timely understanding of mental-health status is urgently required for  
21 the community people. Thus, considering the relevance of all the above factors, we explored  
22 perceptions and attitudes of community members towards their mental well-being during the COVID-  
23 19 pandemic. The present study will potentially guide public health policymakers to plan services that

1 will address the mental health needs of community dwellers which will help to minimize the risk of  
2 psychological distress and promote positive coping mechanisms within them.

### 3 **Research Question:**

4 What are the perceptions and attitudes of community members towards their mental well-being amidst  
5 the COVID-19 pandemic?

### 6 **METHODS:**

#### 7 **Study design and setting:**

8 This study employed an exploratory qualitative research design using semi-structured interviews and  
9 a purposive sampling approach. The present study is being stated as per the guidance provided in  
10 consolidated criteria for reporting qualitative research as seen in Additional file 1. The study was  
11 conducted in two communities of Karachi city. These included Karimabad Federal B Area Block 3  
12 Gulberg Town, Garden East, and Garden West area of Karachi city. Karimabad is a neighborhood in  
13 the Karachi-central district of Karachi, Pakistan. It is situated at the south of Gulberg Town bordering  
14 Liaquatabad, Gharibabad, and Federal B Area. The population of this neighborhood is predominantly  
15 Ismailis. Garden is an up-market neighborhood, which is in the Karachi South district of Karachi,  
16 Pakistan. It is subdivided into two neighborhoods: Garden East and Garden West. The population of  
17 Garden used to be primarily Ismaili and Goan Catholic but has seen increasing numbers of Memons,  
18 Pashtuns, and Baloch.

#### 19 **Patient and public involvement:**

20 There was no patient or public involvement in setting the research agenda.

#### 21 **Data Collection Methods and study participants:**

1  
2  
3 1 The data collection methods for this formative research included in-depth interviews (IDIs) with  
4  
5 2 community members. The aim of the IDIs was to explore community perceptions and attitudes,  
6  
7 3 towards their mental well-being amidst the COVID-19 pandemic. Adult community members who  
8  
9 4 have not contracted the disease were recruited from the urban areas of Karimabad, Garden East, and  
10  
11 5 Garden West, as mentioned in Table 1. The selected participants have an easy access to internet  
12  
13 6 connectivity within their area. We used the purposive sampling technique to ensure that the target  
14  
15 7 population reflected a diverse range of ages, genders, ethnicities, and social backgrounds, as  
16  
17 8 mentioned in Table 2. Participants who refused to give consent to participate in this study were  
18  
19 9 excluded. Also, participants were excluded if they have been tested positive for COVID-19 or have  
20  
21 10 been isolated/quarantined because of recent exposure.  
22  
23  
24  
25  
26

### 27 11 **Data Collection Procedure:**

28  
29  
30 12 Semi-structured interview guide was developed for community members to understand participants  
31  
32 13 perceptions on their mental wellbeing in light of the current situation as mentioned in Additional file  
33  
34 14 2. The in-depth interviews (IDI) participants were identified and contacted via community WhatsApp  
35  
36 15 group and email. Interviews were scheduled on participants' convenient day and time. Before  
37  
38 16 beginning the interview, the study investigators explained the study objectives and procedures to  
39  
40 17 eligible community members. The consent of the eligible participants was taken before the interview  
41  
42 18 begins, in which participants agreed that the interview can be audio-recorded and written notes can be  
43  
44 19 taken. Trained researchers conducted online qualitative interviews via zoom technology or Skype or  
45  
46 20 WhatsApp call function. The interviews were conducted in either Urdu or English language. Study  
47  
48 21 participants were assured that their information remained confidential, and no identifying features will  
49  
50 22 be mentioned on the transcript.  
51  
52  
53  
54  
55  
56

### 57 23 **Ethical considerations:**



1  
2  
3 1 Ethical approval for this study was obtained from the Aga Khan University Ethical Review  
4  
5 2 Committee (AKU-ERC) [2020-4825-10599]. Written informed consent was obtained from the study  
6  
7 3 participants.  
8  
9

#### 10 11 4 **Data analysis:** 12 13

14 5 Study data were analyzed manually using the conventional thematic analysis technique(13). Firstly,  
15  
16 6 the audio recordings from the interviews were transcribed and then translated into the English  
17  
18 7 language. No identifying characteristics were included in the transcriptions. Transcripts were read  
19  
20 8 several times by four research investigators to develop an interpretation of the community perceptions  
21  
22 9 regarding the COVID-19 pandemic and its impact on their mental health. This involved an iterative  
23  
24 10 process where data were coded, compared, contrasted, and refined to generate emergent themes. The  
25  
26 11 transcribed text was divided into ‘meaning units’ which was later shortened and labeled with a ‘code’  
27  
28 12 without losing the study context. Codes were then analyzed and grouped into similar categories. In  
29  
30 13 the final step, similar categories were assembled under sub-themes and main themes. Two independent  
31  
32 14 investigators performed the coding, and category creation and discrepancies were resolved through  
33  
34 15 discussion until a consensus was reached.  
35  
36  
37  
38  
39  
40

#### 41 16 **RESULTS:** 42 43

44 17 In this qualitative study, 27 IDIs were conducted, between May and June 2020, with a variety of  
45  
46 18 community members including, young adults, middle-aged adults, and older adults of both genders.  
47  
48 19 Data collection was ceased once saturation was achieved. Out of the total of 30 participants, (n=27)  
49  
50 20 were agreed to participate in the study. Each interview lasted around 35 to 45 minutes in duration. The  
51  
52 21 demographic information for the IDIs participants is illustrated in Table 2.  
53  
54  
55  
56  
57  
58  
59  
60

1  
2  
3 1 Based on the data collection and thematic analysis, three overarching themes were identified (I) Impact  
4  
5 2 of COVID-19 on the mental health of the general communities; (II) Current coping mechanisms to  
6  
7 3 adapt to the new reality; and (III) Recommendations to address the mental health of communities. The  
8  
9 4 themes and categories are presented in Table 3.

11  
12  
13 5 **Themes 1: Impact of COVID-19 on the mental health of the general communities:**

14  
15  
16 6 **Increased anxiety and fear:**

17  
18  
19 7 Community members shared that the perceived unpredictability associated with COVID-19 has  
20  
21 8 created stress and fear among individuals. Few community people verbalized that explaining and  
22  
23 9 dealing with children's questions about the current outbreak has further added anxiety in these difficult  
24  
25 10 times. Some community people shared their concerns that the closure of school has led to disruption  
26  
27 11 in the learning of children which may have induced anxiety among parents. These all worries and fears  
28  
29 12 have led to a sense of unpredictability about the future, and life after the pandemic. Highlighting these  
30  
31 13 points, a respondent stated:

32  
33  
34  
35  
36  
37 14 *“Obviously there is so much uncertainty about the future ... when this will end? How many people*  
38  
39 15 *will die? How world will look after this pandemic?” (IDI-16)*

40  
41  
42 16 Another fear that community people stated was the lack of adherence to precautionary measures,  
43  
44 17 which may result in rapid transmission of the virus leading to an increased number of cases and loss  
45  
46 18 of lives. Some participants also expressed that being more meticulous in complying with all safety  
47  
48 19 measures against COVID-19 has raised their frustration and stress level. A similar thought is discussed  
49  
50 20 by a respondent:

1  
2  
3 1 *“Even if you go to the grocery shop you need to be extra careful about wearing masks, maintaining*  
4  
5 2 *distance, cleaning hands ... which adds to the stress...On the other hand, other people are not*  
6  
7 3 *following any measures which can eventually get us into trouble.” (IDI-20)*  
8  
9

10  
11 4 While some community members pointed out that they are frightened or scared because currently  
12  
13 5 there is no treatment or vaccine against COVID-19 to control its rapid transmission. Few community  
14  
15 6 individuals also shared that irrespective of disease exposure, they experience dread and anxiety from  
16  
17 7 falling sick and tend to feel false symptoms of disease within them as one participant verbalized:

18  
19  
20  
21 8 *“If you get little flu or a sneeze, it strikes your mind towards COVID-19 symptoms. Even on little body*  
22  
23 9 *ache...one feels like having COVID-19 symptoms.” (IDI-19)*  
24  
25

26  
27 10 Further, some community members related their fear and anxiety with their risk of getting an infection  
28  
29 11 from the workplace and transmitting it to their families, particularly the elderly, children, or people  
30  
31 12 with compromised immune function. Some community people also voiced their concern that many  
32  
33 13 private hospitals have been unable to accept and manage new COVID-19 patients which also induces  
34  
35 14 a panic situation among community members. Expressing similar concerns, a participant revealed:

36  
37  
38  
39 15 *“I am scared about my family ... My father is a chronic kidney patient; his immunity is very low. There*  
40  
41 16 *is a fear that if he will get infected ...Will there be any space in the hospital. Further, how he would*  
42  
43 17 *go through the entire process as he is already immune-compromised... So, there is a fear of losing*  
44  
45 18 *my father or losing any other family member.” (IDI-25)*  
46  
47  
48

### 49 19 **Financial hardship amid COVID-19 affecting psychological health:**

50  
51  
52 20 Many community members mentioned that the current pandemic has affected the global economy  
53  
54 21 which will undoubtedly lead to financial losses impacting individuals financially, mostly daily wages  
55  
56  
57  
58  
59  
60

1  
2  
3 1 workers. Dialogue with the community people indicated that their business is either on hold or  
4  
5 2 concluded due to which individuals face difficulty in making their ends meet. Some of the community  
6  
7 3 individuals also revealed that they faced layoffs or salary deductions in these challenging times. This  
8  
9  
10 4 has eventually affected the economic conditions of the family and they stated that they will have to  
11  
12 5 start over again to get settled in their lives. Highlighting these points, a respondent stated:

13  
14  
15 6 *“We have a garment shop and we thought to earn well in Ramadan. But due to COVID-19, the shop*  
16  
17 7 *was closed and we were not able to earn even during the peak time. It seems that we would have to*  
18  
19 8 *wait for a year to get back to the normal routine.” (IDI-17)*

20  
21  
22  
23 9 Moreover, the financial hardships related to the pandemic have translated into widespread emotional  
24  
25 10 distress and increased risk for a psychiatric condition. Similar, comments on the experience of mental  
26  
27 11 distress are discussed by a participant:

28  
29  
30  
31 12 *“Many people have lost their jobs...no money to buy grocery and to run house...These people are*  
32  
33 13 *suffering from anxiety and depression. I have heard that few people have attempted suicide because*  
34  
35 14 *they have no money to survive in this world.” (IDI-5)*

### 36 37 38 39 15 **Restrictions to routine religious practices affecting mental health:**

40  
41  
42 16 A number of mass prayers and gatherings in religious places are prohibited which was the source of  
43  
44 17 internal satisfaction and get-together for many individuals, resulting in mental sufferings among  
45  
46 18 community people. Community members verbalized that they used to spend their quality time in the  
47  
48 19 prayer hall to gain strength and positive energy. Highlighting this point, a respondent verbalized

49  
50  
51  
52 20 *“I miss my prayer hall (Jamat Khana). Closure of prayer hall has been very difficult as there is a*  
53  
54 21 *feeling of incompleteness and dissatisfaction.” (IDI-11)*

1 During interviews, many community members also gave insight regarding traditional burial and  
2 funeral practices that has been halted due to COVID-19. They shared their concerns that burial  
3 practices such as ritual wash (ghusl), shrouding/covering the body (kafan), and funeral prayers could  
4 not be performed for the deceased in the current situation. Further, they shared that they are unable to  
5 counsel and provide moral support to the bereaved family members. This has heightened their fear  
6 and anxiety level and they are scared of dying in this way. This point was illustrated by a respondent  
7 who stated:

8 *“I have observed that ritual wash is not given to the dead body because of the current situation. I*  
9 *don’t want to die like this. I believe burial practices and rituals are so much necessary for the*  
10 *deceased.” (IDI-11)*

#### 11 **Effects of media on emotions:**

12 Community members mentioned that there is no source of entertainment because all types of media  
13 are currently displaying information related to the COVID-19 pandemic. Majority of the community  
14 members shared that they are uncertain about the source and authenticity of the information provided  
15 by the media. Highlighting this view, a participant expressed:

16 *“Media used to entertain us in diverse ways but nowadays all kinds of media are focusing on COVID-*  
17 *19 cases and mortality rates .... further media exaggerate the information about COVID-19 and*  
18 *present to us which has negatively affected us.” (IDI-21)*

19 Many individuals shared that the repeated media exposure about COVID-19 has enhanced their  
20 psychological distress. They are overwhelmed with misinformation and rumors which impaired their  
21 concentration and daily functioning. During the interviews, a community participant shared:

1  
2  
3 1 *“Media has negatively affected us. Media such as news channel has a devastating impact on everyone*  
4  
5 2 *particularly senior citizens who are at home. If I talk about my mother-in-law, she keeps on watching*  
6  
7 3 *the news and that has disturbed her so much. She is not coming out of this trauma (COVID-19) ... She*  
8  
9 4 *is not even coming out of her bed or not even meeting anyone due to the influence of media.” (IDI-4)*

10  
11  
12  
13 5 Some community people notified that media can work positively on a larger scale to nurture  
14  
15 6 community well-being but unfortunately no such direction has been witnessed from their end. Many  
16  
17 7 community members reported that they are avoiding mass media use to promote their mental  
18  
19 8 wellbeing and to remain mentally stable. Highlighting this view, a participant expressed:

20  
21  
22  
23 9 *“I don’t watch the news on media otherwise I will suffer from depression. It is important that we don’t*  
24  
25 10 *watch the news and take care of ourselves.” (IDI-14)*

### 26 27 28 29 11 **Effects of social isolation on temperament, feelings, and emotions:**

30  
31  
32 12 Community members highlighted that the major repercussion of the COVID-19 outbreak is a  
33  
34 13 restriction on socialization. The lack of social interaction has substantially influenced the behavior of  
35  
36 14 people. This is evident by greater psychological distress in the form of anxiety, anger, and irritability  
37  
38 15 that results in increased disputes and domestic violence within the families. Similar feelings revealed  
39  
40 16 by the participant:

41  
42  
43  
44  
45 17 *“Physical connection has been broken down from relatives and friends. Overall, everyone has become*  
46  
47 18 *irritable even on minor issues because one cannot go out, vent out their feelings, and meet friends.*  
48  
49 19 *This has resulted in disputes within the family on small concerns.” (IDI-2)*

50  
51  
52  
53 20 Few people also expressed that working from home is another challenge as you have to show 24/7  
54  
55 21 availability. This has increased their burden and caused agitation as they find difficulty in balancing

1 their work and home life together. Some participants also verbalized that their fears and increased  
2 agitation have resulted in sleep disruptions and restlessness. Highlighting this view, a participant  
3 expressed:

4 *“Work from home is another stressful thing for me in this pandemic because there is no time limit.*  
5 *Usually, after office hours we are not responsible for any task or to respond back...But nowadays we*  
6 *have to show our availability every time... even on weekends.” (IDI-2)*

## 7 **Theme 2: Current coping mechanisms to adapt to the new reality:**

### 8 **Getting closer to God amid COVID-19:**

9 A fundamental element in adjusting to these detrimental circumstances is coping. Each individual in  
10 the community found their coping mechanism to deal with the COVID-19 pandemic. Majority of the  
11 community members shared that during these challenging times they have come closer to God by  
12 spending more time praying and being connected with supreme power. Few community individuals  
13 also expressed that religion and faith give them strength, and hope to manage the current stressful  
14 situation. Highlighting this thought a participant discussed:

15 *“This pandemic has provided us an opportunity to connect with our religion... people should come*  
16 *closer to their religion. If they will timely perform their prayers, then it will automatically reduce*  
17 *more than half of their stress and anxiety in this crisis time.” (IDI-22)*

### 18 **Connecting with community members, friends, and relatives:**

19 Social-isolation is an unusual experience for an individual however, a supportive environment by the  
20 family plays a crucial role to cope during the outbreak. Community members shared that lockdown  
21 and social distancing have positive aspects as well; as families spend more time together. Spending

1 quality time with family and relatives can bring a sense of ease and comfort. Further, during these  
2 unprecedented times, many families reported the use of online technologies to interact with other  
3 relatives and friends. Expressing similar thoughts, a participant verbalized:

4 *“In these times, families should get united ... positive point is that people, who were unable to spend*  
5 *time with their family, are now spending quality time with family. Due to COVID-19, we are sitting*  
6 *together, avoiding mobile phones, and doing table talk. Before COVID-19, I was connected with the*  
7 *world. But I had no idea what is happening at my home. COVID-19 has brought this positive change*  
8 *in life.” (IDI-17)*

### 9 **Resetting lives amid COVID-19:**

10 Some of the respondents verbalized that setting up a daily routine like indulging in house-hold chores  
11 (cleaning and cooking) helped them to spend their time productively. Others highlighted that they  
12 spent time on hobbies such as reading, writing, listening to music, and singing, photography, playing  
13 indoor games, performing home workouts (exercises and yoga) to stay active and motivated. While  
14 some of the individuals utilized their time effectively in distance learning courses and gaining new  
15 skills. A participant shared:

16 *“Now a day, I am doing a lot of activities with my daughter. We are doing the artwork (painting) and*  
17 *learning new kinds of painting. I and my daughter have also learned baking during this lockdown*  
18 *period. Other than that, we are playing different games such as Ludo to keep ourselves busy.” (IDI-*  
19 *3)*

### 20 **Participating in mental health programs:**



1 During these difficult times when there is a deluge of information on COVID-19, community members  
2 stated that there is a need to divert their minds by planning strategies and programs that promote their  
3 mental wellbeing. Some community people shared that to overcome anxiety, fear, and stress in this  
4 pandemic, mental health programs are initiated by some community leaders and volunteers. These  
5 programs were reported to be useful as they guide people to cope positively and are very helpful for  
6 those who are depressed and anxious. Highlighting these views, a community participant verbalized:

7 *“Last Sunday, I attended a psychologist session on “Mindfulness journey to a peace full life”,*  
8 *organized by my community. It was a very good program that guided us on how to be positive. The*  
9 *session focused on the issue of anxiety and stress in this pandemic situation. The session helped in*  
10 *developing a sense of optimism and broadening the horizon of our perceptions. These different types*  
11 *of sessions are running in our community which are very helpful for us to cope in present time.” (IDI-*  
12 *5)*

### 13 **Theme 3: Recommendations to address the mental health of communities:**

#### 14 **Assessing mental health needs of communities:**

15 Some community members shared that mental health issues are considered taboo in our society and  
16 people usually avoid talking about them. In that regard, community people pointed out that it is  
17 fundamental to assess the mental health needs of the community to plan and design appropriate mental  
18 health services. Alongside some community members mentioned that these mental health programs  
19 will also be beneficial for the COVID-19 patients and their family members. Highlighting these points,  
20 a respondent stated:

21 *“I believe that if there will be any survey or study conducted to understand the effects of COVID-19*  
22 *on general population ... The results of the survey will certainly reveal that COVID-19 has more*

1  
2  
3 1 *effects on mental health as compared to the physiology of a person. Therefore, the government should*  
4  
5 2 *conduct the survey and identify the households that have mental health issues and should send flyers*  
6  
7 3 *or brochures that help them in coping.” (IDI-15)*  
8  
9

#### 10 4 **Delivering remote mental health interventions for the elderly:**

11  
12  
13  
14 5 Most of the community members expressed that the long-term impact of the pandemic would be  
15  
16 6 stressful for every individual particularly elders who are vulnerable given their weaker immune  
17  
18 7 systems. Some community members conveyed that the current pandemic has called upon great  
19  
20 8 transformation in terms of delivering remote mental health services via using basic technologies such  
21  
22 9 as the telephone, SMS, and radio. However, there is a lack of opportunities to monitor the psychosocial  
23  
24 10 needs of elders and deliver support to them.  
25  
26  
27

28  
29 11 *“There are different mental health programs and sessions which are organized by our Jamati*  
30  
31 12 *institutions. But we are not providing any mental health session for our mass population that is our*  
32  
33 13 *senior citizens or elder people.” (IDI-2)*  
34  
35

#### 36 14 **Role of government to support the mental health of communities:**

37  
38  
39  
40 15 During the interview, community members notified that the government is only providing awareness  
41  
42 16 about COVID-19 and are not focusing on the psychological needs of the community members. Few  
43  
44 17 community individuals also mentioned that no funding is allocated by the government to tackle the  
45  
46 18 mental health challenges of the community in this outbreak. In this context, many community people  
47  
48 19 recommended the need for quality mental health services from the government at the national and  
49  
50 20 provincial levels. Expressing similar views, a participant mentioned:  
51  
52  
53  
54  
55  
56  
57  
58  
59  
60

1  
2  
3 1 *“Government is not considering mental health issues. They should start mental health programs which*  
4  
5 2 *could include online counseling sessions or programs that could lighten the moods of the general*  
6  
7 3 *population. They can also raise mental health awareness via talk shows or through any other*  
8  
9 4 *activity...government can use media to raise awareness and conduct mental health programs.” (IDI-*  
10  
11  
12 5 *7)*  
13  
14

## 6 **DISCUSSION:**

7 The current study aimed to explore the perceptions and attitudes of community members towards their  
8 mental well-being in light of the current pandemic. The study was conducted about four months after  
9 the primary episode of the COVID-19 pandemic and two months after the virus hit Pakistan. The  
10 research highlighted the mental health challenges faced by the community members in this  
11 unprecedented time, alongside strategies and future recommendations to cope with the current crisis.

12 The study findings revealed that community participants experienced the feeling of anxiety and chaos  
13 due to the outbreak. The individuals’ emotional reaction and sense of danger stemmed from their  
14 concerns regarding their health as well as their family members. Evidence also suggests that there is  
15 increased anxiety and fear among people that have been in contact with the suspected COVID-19  
16 individuals or with any infected material (14). Community people were fearful of the increasing  
17 number of cases and high mortality rate in the country due to lack of adherence to precautionary  
18 measures. Literature also pointed out that following precautionary measures, along with the good level  
19 of confidence in doctors’ diagnosing the COVID-19 virus were found to be protective factors of  
20 psychological distress(15). While the uncertainty of the pandemic progression and fears to settle down  
21 their lives in this disaster caused more mental suffering on them. Recent studies conducted in Italy  
22 and Iran also showed that fear of COVID-19 was associated with depression and anxiety among the  
23 general population (10, 16). Similarly, a study conducted on the population of seven middle-income

1 countries of Asia also showed that participants from Pakistan reported the second-highest scores on  
2 depression, anxiety, and stress (DASS-21) tool(17).

3 One of the major repercussions of the COVID-19 outbreak is the social distancing and isolation that  
4 have been widely implemented to counter the present crisis. The local government has limited social  
5 mobility by employing diverse measures such as the closure of schools, colleges, and universities,  
6 banned on public gatherings, religious places, and unessential workplaces, restricting public  
7 transportation, travels, and limiting social contacts. This has eventually hampered an individual's  
8 source of happiness, connectedness, and sense of internal satisfaction(18, 19). A study also showed  
9 that long home-stay, current quarantine, unnecessary fear, and discrimination were significantly  
10 related to the moderate-to-severe level of stress, anxiety, and depression (20). Our study findings  
11 showed that community members felt overwhelmed by staying at home and they experienced  
12 frustration, agitation/anxiety, boredom, and loneliness due to lack of physical interaction. A systematic  
13 review also reported an association between social isolation and loneliness with impaired  
14 psychological well-being (8).

15 The closure of prayer halls and prohibition of congregational funeral prayers during the COVID-19  
16 pandemic was another overwhelming concern for many community members. The study finding  
17 showed that community people were distressed as they were unable to bury their loved ones or counsel  
18 the deceased family members following their religious burial rites. This has raised the sense of shock,  
19 and pain among individuals in the society and they were scared of dying in such circumstances. Similar  
20 evidence was reported by Wallace et al., 2020, families that were unable to grieve as per traditional  
21 funeral practices or being unable to attend a loved one's burial undergo a feeling of grief and sorrow  
22 (21).

1  
2  
3 1 Our study found that the pandemic has caused significant financial disruption among the community  
4  
5 2 members. It was identified that many families were struggling hard in the present time due to financial  
6  
7 3 insecurities including unemployment, and salary deduction. This has caused increased anxiety and  
8  
9 4 depression among families that leads to long-lasting negative mental health consequences. Emerging  
10  
11 5 evidence also suggested similar findings that most of the study participants felt anxious about  
12  
13 6 economic restraint throughout lockdown and nearly one-fourth suffered from depressive  
14  
15 7 symptoms(4). Further, in the light of the widening financial crisis and unpredictability surrounding  
16  
17 8 this outbreak, suicidal attempts may emerge as one of the emerging threats among the community(22,  
18  
19 9 23).

20  
21  
22  
23  
24 10 Interestingly, the COVID-19 has another challenge in the present age of social media. Our study  
25  
26 11 determined that community people being confined to four walls rely on diverse modes of media  
27  
28 12 (electronic and print media, as well as social media) to receive up-to-date information, but they are  
29  
30 13 often overloaded with false information and rumors. This overwhelming or exaggerated information  
31  
32 14 from the media shaped the risk perception of community members that give rise to epidemic-related  
33  
34 15 emotion, creating fear, anxiety, and stress. The finding is consistent with the studies conducted in  
35  
36 16 China, and India that also related increased frequency of media exposure with the higher anxiety level  
37  
38 17 among the public (24, 25). Additionally, many community members inferred the presence of physical  
39  
40 18 or somatic symptoms with COVID-19 infection that heightened psychological distress among them.  
41  
42 19 Literature also notified that physical symptoms that resemble with COVID-19 virus were related to a  
43  
44 20 perceived effect of the pandemic and resulted in severe mental health consequences(26).

45  
46  
47  
48  
49  
50  
51 21 Although the COVID-19 illness in its first instance seems like a physical health crisis it has devastating  
52  
53 22 repercussions on mental health. However, in this unstable condition, many individuals have adopted  
54  
55 23 diverse lifestyle-related measures to cope with the circumstances and ease the suffering. Many  
56  
57  
58  
59  
60

1  
2  
3 1 community members took support from their religious practices and beliefs to cope in this stressful  
4  
5 2 time. Literature also reported that community adults considered current stressful time as an  
6  
7 3 opportunity to deepen their spiritual faith or personal connection with God through prayer, meditation,  
8  
9 4 and reciting scriptures that nurtures the soul (19).

10  
11  
12  
13 5 Further many isolated individuals engaged themselves in diverse tasks or activities to live their best  
14  
15 6 possible life. Many community members carried on their hobbies including painting, reading, writing,  
16  
17 7 listening to music or motivational videos, singing, playing an instrument, cooking, and exercise and  
18  
19 8 learning new skills via online courses to spend their spare time productively. This sort of behavioral  
20  
21 9 activity helped to divert the mind of the person and create positive emotions that enable individuals to  
22  
23 10 bounce back from negative feelings and lessen their psychological distress (27). Additionally, in the  
24  
25 11 current situation, many families got a chance to spend quality time with each other that brought  
26  
27 12 harmony and positivity within them. This finding is also consistent with the literature (28).

28  
29  
30  
31  
32 13 The study finding revealed that the community leaders and volunteers organized different mental  
33  
34 14 health sessions for community people through online mediums. These sessions are essential during  
35  
36 15 pandemics as they helped to reduce mental suffering and promoted adaptive coping strategies.  
37  
38 16 However, participants also notified that there is a lack of provision of mental health services for elderly  
39  
40 17 who lived alone and are now being forced to stay in their homes. Evidence also suggests that  
41  
42 18 vulnerable groups including elders are restricted to their households during the pandemic can have  
43  
44 19 devastating mental health outcomes(29). The participants also voiced their concerns that government  
45  
46 20 officials are not providing any psychological services to the community on a larger scale.

47  
48  
49  
50  
51  
52 21 In this regard, our study also reported some recommendations to address the mental health needs of  
53  
54 22 the communities. Community participants suggested the need of developing mental health assessment  
55  
56 23 tools along with need-based interventions at the national and provincial levels to mitigate long-lasting

1  
2  
3 1 mental health effects. WHO has also emphasized taking the essential provisions to deal with the  
4  
5 2 psychological consequences of COVID-19 (30). Our study participants suggested the need for remote  
6  
7 3 mental health programs for the entire community particularly elders via using basic technologies such  
8  
9 4 as the telephone, SMS, and radio. National broadcasting via television or radio is a significant tool to  
10  
11 5 motivate people in present times of hopelessness(31, 32). These platforms can be served as a powerful  
12  
13 6 medium for creating awareness and arranging counseling sessions by different psychiatrists or  
14  
15 7 psychologists. Further, the nationalized TV or radio can also arrange diverse activities (patriotic songs,  
16  
17 8 shows, or movies) that will lessen stress among people and create a sense of unity within them.  
18  
19 9 Similarly, the religious scholars on media can be very helpful to motivate the masses and boost their  
20  
21 10 morale to face crises(32). Therefore, mass-media can be used as an effective information platform that  
22  
23 11 will convey timely health-related messages about pandemic and assist in reducing mental distress (33).  
24  
25 12 Alongside, community service workers can also assist the community by providing authentic health  
26  
27 13 information and education that will lessen their anxiety level(34). The present study also suggested  
28  
29 14 the need for psychological helplines for mental health counseling related to COVID-19. While, in this  
30  
31 15 period of social distancing, introducing innovative medium (telehealth) in healthcare services can also  
32  
33 16 provide effective psychological support services for communities that are affected by the COVID-19  
34  
35 17 pandemic (35). However, this calls for strategies that will strengthen the operational capacity of the  
36  
37 18 healthcare system i.e. enhance health expert's quality and quantity, provision of proper medical  
38  
39 19 supplies, allocation of administrative staff, and development of training programs(36). Therefore, as  
40  
41 20 suggested by our study participants that allocation of proper funding by the government is pivotal to  
42  
43 21 provide quality mental health services  
44  
45  
46  
47  
48  
49  
50  
51

## 52 **STRENGTH AND LIMITATIONS:**

53  
54  
55  
56  
57  
58  
59  
60

1  
2  
3 1 This is one of the few studies that have explored community perception regarding COVID-19 and its  
4  
5 2 impact on mental well-being. This study has some limitations. Given the nature of the disease, all  
6  
7 3 interviews were conducted online so the researcher was unable to capture the non-verbal cues of  
8  
9 4 participants. Besides, the findings of the present study should be taken as explorative rather than  
10  
11 5 definitive, as all participants were selected from two localities, it would be better to recruit participants  
12  
13 6 from different areas. Further, the researcher was unable to perform focus group interviews which  
14  
15 7 would have presented in-depth insight. Lastly, future studies are required to understand the  
16  
17 8 psychological impact of this pandemic on the community across time.  
18  
19  
20  
21

## 22 9 **CONCLUSION:**

23  
24  
25 10 This study provides a detailed understanding of community experiences and diverse pandemic-related  
26  
27 11 mental health challenges among young, middle, and older age adults in Pakistan. Moreover, the  
28  
29 12 finding suggests that during the outbreak continuous support for psychosocial well-being in all age  
30  
31 13 groups should be of utmost priority. Additionally, the current disruptive situation calls for the initiation  
32  
33 14 of novel innovative opportunities to provide mental health facilities that foster effective utilization of  
34  
35 15 available resources. The finding of this study guides the development of context-specific mental health  
36  
37 16 programs to overcome the repercussions of the pandemic. These psychological interventions will not  
38  
39 17 only be beneficial during the COVID-19 pandemic but could offer a long-term advantage of  
40  
41 18 strengthening the system.  
42  
43  
44  
45  
46  
47  
48  
49  
50  
51  
52  
53  
54  
55  
56  
57  
58  
59  
60



1  
2  
3 **1 Abbreviations:**

4 2 IDI: In-depth Interviews, M: Male, F: Female  
5  
6 3

7 **4 Acknowledgments:**

8 5 The authors would like to thanks participants for their time.  
9  
10 6

11 **7 Authors' contributions:**

12 8 NAA & ASF designed the study. ASF, NAA, NBA, RF, and SNM collected the data. NAA & ASF  
13 9 analyzed and interpreted the data. NAA wrote the first draft of the manuscript. ASF & SS has given  
14 10 critical feedback. All authors contributed to reviewing and editing the manuscript.  
15  
16 11

17 **12 Funding:**

18 13 This research did not receive any specific grant from funding agencies in the public, commercial, or  
19 14 not-for-profit sectors.  
20  
21 15

22 **16 Availability of data and materials:**

23 17 The datasets were collected and analyzed and can be made available from the corresponding author  
24 18 on reasonable request.  
25  
26 19

27 **19 Ethics approval:**

28 20 Ethical approval for this study was obtained from the Aga Khan University Ethical Review Committee  
29 21 (AKU-ERC) [2020-4825-10599].  
30  
31 22

32 **23 Consent for publication:**

33 24 Written informed consent for publication was obtained.  
34  
35 25

36 **26 Competing interests:**

37 27 The authors declare that they have no competing interests.  
38  
39 28  
40  
41  
42  
43  
44  
45  
46  
47  
48  
49  
50  
51  
52  
53  
54  
55  
56  
57  
58  
59  
60

1 **Table 1 Study participants for In-depth Interviews**

| <b>In-depth interview Participants</b> | <b>Total IDIs= 27</b> | <b>Male (M)=12; Female (F)=14</b> |
|----------------------------------------|-----------------------|-----------------------------------|
| Young adults (18 -35 years)            | 12                    | Male=6; Female=6                  |
| Middle-aged adults (36-55 years)       | 8                     | Male=4; Female=4                  |
| Older adults (> 55 years)              | 7                     | Male=3; Female=4                  |

4 **Table 2: Characteristics of In-depth Interview (IDI) Study Participants (IDI=27)**

| <b>Characteristics of participants (n=27)</b> |               | <b>n(%) or mean <math>\pm</math> SD</b> |
|-----------------------------------------------|---------------|-----------------------------------------|
| Gender                                        | Female        | 14 (52.0%)                              |
|                                               | Male          | 13 (48.0%)                              |
| Age range                                     | 18 -35 years  | 12 (44.4%)                              |
|                                               | 36-55 years   | 8 (29.6%)                               |
|                                               | > 55 years    | 7 (25.9%)                               |
| Mean age                                      |               | 39.6 $\pm$ 13.9                         |
| Ethnicity                                     | Urdu Speaking | 5 (18.5%)                               |
|                                               | Sindhi        | 6 (22.2%)                               |
|                                               | Gujrati       | 7 (25.9%)                               |
|                                               | Katchi        | 5 (18.5%)                               |
|                                               | Punjabi       | 4 (14.8%)                               |
| Marital Status                                | Single        | 9 (33.3%)                               |
|                                               | Married       | 18 (66.6%)                              |
| Education level                               | Matriculate   | 1 (4.0 %)                               |
|                                               | Intermediate  | 4 (15.0%)                               |
|                                               | Bachelors     | 13 (48.0%)                              |
|                                               | Masters       | 9 (33.0%)                               |
| Occupation                                    | Private Job   | 15 (56.0%)                              |
|                                               | Self-employed | 3 (11.0%)                               |
|                                               | Home maker    | 6 (22.0%)                               |
|                                               | Student       | 2 (7.0% )                               |
|                                               | Retired       | 1 (4.0%)                                |

1 **Table 3: Themes and categories**

| Themes                                                         | Categories                                                                                                                                                                                                                                                                                                                                                              |
|----------------------------------------------------------------|-------------------------------------------------------------------------------------------------------------------------------------------------------------------------------------------------------------------------------------------------------------------------------------------------------------------------------------------------------------------------|
| Impact of COVID-19 on mental health of the general communities | <ul style="list-style-type: none"> <li>• Increased anxiety and fear</li> <li>• Financial hardship amid COVID-19 adversely affecting psychological health</li> <li>• Restrictions to routine religious practices affecting mental health</li> <li>• Effects of media on emotions</li> <li>• Effects of social isolation on temperament, feelings and emotions</li> </ul> |
| Current coping mechanisms to adapt to the new reality          | <ul style="list-style-type: none"> <li>• Getting closer to God amid COVID-19</li> <li>• Connecting online with community members, friends, and relatives</li> <li>• Resetting lives amid COVID-19</li> <li>• Participating in mental health programs</li> </ul>                                                                                                         |
| Recommendations to address mental health of communities        | <ul style="list-style-type: none"> <li>• Assessing mental health needs of communities</li> <li>• Delivering remote mental health interventions for elderly</li> <li>• Role of government to support mental health of communities</li> </ul>                                                                                                                             |

2

3

4

5

6

7

8

9

10

11

12

13

14

15

16

**1 REFERENCES:**

1. World Health Organization. Mental health and psychosocial considerations during the COVID-19 outbreak, 18 March 2020. World Health Organization.
2. Ebrahim SH, Ahmed QA, Gozzer E, Schlagenhauf P, Memish ZA. Covid-19 and community mitigation strategies in a pandemic. *British Medical Journal Publishing Group*; 2020.
3. Xiong J, Lipsitz O, Nasri F, Lui LM, Gill H, Phan L, et al. Impact of COVID-19 pandemic on mental health in the general population: A systematic review. *Journal of affective disorders*. 2020.
4. Chakraborty K, Chatterjee M. Psychological impact of COVID-19 pandemic on general population in West Bengal: A cross-sectional study. *Indian Journal of Psychiatry*. 2020;62(3):266.
5. Tran BX, Nguyen HT, Le HT, Latkin CA, Pham HQ, Vu LG, et al. Impact of COVID-19 on economic well-being and quality of life of the Vietnamese during the national social distancing. *Frontiers in psychology*. 2020;11.
6. Zhou X, Snoswell CL, Harding LE, Bambling M, Edirippulige S, Bai X, et al. The Role of Telehealth in Reducing the Mental Health Burden from COVID-19. *Telemedicine and e-Health*. 2020.
7. Le HT, Lai AJX, Sun J, Hoang MT, Vu LG, Pham HQ, et al. Anxiety and depression among people under the nationwide partial lockdown of Vietnam. *Frontiers in public health*. 2020;8:656.
8. Brooks SK, Webster RK, Smith LE, Woodland L, Wessely S, Greenberg N, et al. The psychological impact of quarantine and how to reduce it: rapid review of the evidence. *The Lancet*. 2020.
9. van Weel C, Kassai R, Qidwai W, Kumar R, Bala K, Gupta PP, et al. Primary healthcare policy implementation in South Asia. *BMJ global health*. 2016;1(2):e000057.
10. Soraci P, Ferrari A, Abbiati FA, Del Fante E, De Pace R, Urso A, et al. Validation and psychometric evaluation of the Italian version of the Fear of COVID-19 Scale. *International Journal of Mental Health and Addiction*. 2020:1-10.
11. Kumar A, Nayar KR. COVID 19 and its mental health consequences. *Journal of Mental Health*. 2020:1-2.
12. Wang C, Chudzicka-Czupala A, Grabowski D, Pan R, Adamus K, Wan X, et al. The association between physical and mental health and face mask use during the COVID-19 pandemic: a comparison of two countries with different views and practices. *Frontiers in psychiatry*. 2020;11:901.
13. Vaismoradi M, Turunen H, Bondas T. Content analysis and thematic analysis: Implications for conducting a qualitative descriptive study. *Nursing & health sciences*. 2013;15(3):398-405.
14. Wang C, Pan R, Wan X, Tan Y, Xu L, Ho CS, et al. Immediate psychological responses and associated factors during the initial stage of the 2019 coronavirus disease (COVID-19) epidemic among the general population in China. *International journal of environmental research and public health*. 2020;17(5):1729.
15. Wang C, Pan R, Wan X, Tan Y, Xu L, McIntyre RS, et al. A longitudinal study on the mental health of general population during the COVID-19 epidemic in China. *Brain, behavior, and immunity*. 2020;87:40-8.
16. Ahorsu DK, Lin C-Y, Imani V, Saffari M, Griffiths MD, Pakpour AH. The fear of COVID-19 scale: development and initial validation. *International journal of mental health and addiction*. 2020.

- 1 17. Wang C, Tee M, Roy AE, Fardin MA, Srichokchatchawan W, Habib HA, et al. The impact of  
2 COVID-19 pandemic on physical and mental health of Asians: A study of seven middle-income  
3 countries in Asia. *PloS one*. 2021;16(2):e0246824.
- 4 18. Ho CS, Chee CY, Ho RC. Mental health strategies to combat the psychological impact of  
5 COVID-19 beyond paranoia and panic. *Ann Acad Med Singapore*. 2020;49(1):1-3.
- 6 19. Koenig HG. Ways of protecting religious older adults from the consequences of COVID-19.  
7 *The American Journal of Geriatric Psychiatry*. 2020.
- 8 20. Tee ML, Tee CA, Anlakan JP, Aligam KJG, Reyes PWC, Kuruchittham V, et al. Psychological  
9 impact of COVID-19 pandemic in the Philippines. *Journal of affective disorders*. 2020;277:379-91.
- 10 21. Wallace CL, Wladkowski SP, Gibson A, White P. Grief during the COVID-19 pandemic:  
11 considerations for palliative care providers. *Journal of Pain and Symptom Management*. 2020.
- 12 22. Lee SA. Coronavirus Anxiety Scale: A brief mental health screener for COVID-19 related  
13 anxiety. *Death studies*. 2020;44(7):393-401.
- 14 23. Mamun MA, Ullah I. COVID-19 suicides in Pakistan, dying off not COVID-19 fear but  
15 poverty?—The forthcoming economic challenges for a developing country. *Brain, behavior, and  
16 immunity*. 2020.
- 17 24. Gao J, Zheng P, Jia Y, Chen H, Mao Y, Chen S, et al. Mental health problems and social media  
18 exposure during COVID-19 outbreak. *Plos one*. 2020;15(4):e0231924.
- 19 25. Suryawanshi R, More V. A study of effect of Corona Virus Covid-19 and lock down on human  
20 psychology of Pune City region. *Studies in Indian Place Names*. 2020;40(70):984-94.
- 21 26. Wang C, Chudzicka-Czupała A, Tee ML, Núñez MIL, Tripp C, Fardin MA, et al. A chain  
22 mediation model on COVID-19 symptoms and mental health outcomes in Americans, Asians and  
23 Europeans. *Scientific Reports*. 2021;11(1):1-12.
- 24 27. Polizzi C, Lynn SJ, Perry A. STRESS AND COPING IN THE TIME OF COVID-19: PATHWAYS TO  
25 RESILIENCE AND RECOVERY. *Clinical Neuropsychiatry*. 2020;17(2).
- 26 28. Kar SK, Arafat SY, Kabir R, Sharma P, Saxena SK. Coping with mental health challenges  
27 during COVID-19. *Coronavirus Disease 2019 (COVID-19)*: Springer; 2020. p. 199-213.
- 28 29. Armitage R, Nellums LB. COVID-19 and the consequences of isolating the elderly. *The  
29 Lancet Public Health*. 2020;5(5):e256.
- 30 30. Yao H, Chen J-H, Xu Y-F. Rethinking online mental health services in China during the COVID-  
31 19 epidemic. *Asian journal of psychiatry*. 2020;50:102015.
- 32 31. Latif F, Bashir MF, Komal B, Tan D. Role of electronic media in mitigating the psychological  
33 impacts of novel coronavirus (COVID-19). *Psychiatry research*. 2020;289:113041.
- 34 32. Mumtaz M. COVID-19 and mental health challenges in Pakistan. *International Journal of  
35 Social Psychiatry*. 2020:0020764020954487.
- 36 33. Tran BX, Dang AK, Thai PK, Le HT, Le XTT, Do TTT, et al. Coverage of health information by  
37 different sources in communities: implication for COVID-19 epidemic response. *International  
38 journal of environmental research and public health*. 2020;17(10):3577.
- 39 34. Le HT, Mai HT, Pham HQ, Nguyen CT, Vu GT, Phung DT, et al. Feasibility of intersectoral  
40 collaboration in epidemic preparedness and response at grassroots levels in the threat of COVID-19  
41 pandemic in Vietnam. *Frontiers in Public Health*. 2020;8:648.
- 42 35. Tran BX, Hoang MT, Vo LH, Le HT, Nguyen TH, Vu GT, et al. Telemedicine in the COVID-19  
43 pandemic: Motivations for integrated, interconnected, and community-based health delivery in  
44 resource-scarce settings? *Frontiers in psychiatry*. 2020;11.

1  
2  
3  
4  
5  
6  
7  
8  
9  
10  
11  
12  
13  
14  
15  
16  
17  
18  
19  
20  
21  
22  
23  
24  
25  
26  
27  
28  
29  
30  
31  
32  
33  
34  
35  
36  
37  
38  
39  
40  
41  
42  
43  
44  
45  
46  
47  
48  
49  
50  
51  
52  
53  
54  
55  
56  
57  
58  
59  
60

1 36. Tran BX, Hoang MT, Pham HQ, Hoang CL, Le HT, Latkin CA, et al. The operational readiness  
2 capacities of the grassroots health system in responses to epidemics: Implications for COVID-19  
3 control in Vietnam. Journal of global health. 2020;10(1).

4

For peer review only

1  
2  
3  
4  
5  
6  
7  
8  
9  
10  
11  
12  
13  
14  
15  
16  
17  
18  
19  
20  
21  
22  
23  
24  
25  
26  
27  
28  
29  
30  
31  
32  
33  
34  
35  
36  
37  
38  
39  
40  
41  
42  
43  
44  
45  
46  
47  
48  
49  
50  
51  
52  
53  
54  
55  
56  
57  
58  
59  
60

1

For peer review only

1  
2  
3 **1 Supplementary Material:**4  
5 **2 Additional file 1: COREQ 32-ITEM CHECKLIST**6  
7 **3**8  
9 **4**

| No. Item                                      | Guide questions/description                                            | Reported on Page #                                                             |
|-----------------------------------------------|------------------------------------------------------------------------|--------------------------------------------------------------------------------|
| Domain 1: Research team and reflexivity       |                                                                        |                                                                                |
| 1. Inter viewer/facilitator                   | Which author/s conducted the interview?                                | Page # 8 (Data Collection Procedure)                                           |
| 2. Credentials                                | What were the researcher's credentials?                                | Page # 8 (Data Collection Procedure)                                           |
| 3. Occupation                                 | What was their occupation at the time of the study?                    | Page # 8 (Data Collection Procedure)                                           |
| 4. Gender                                     | Was the researcher male or female?                                     | Page # 8 (Data Collection Procedure)                                           |
| 5. Experience and training                    | What experience or training did the researcher have?                   | Page # 8 (Data Collection Procedure)                                           |
| 6. Relationship with participants established | Was a relationship established prior to study commencement?            | Page # 8 (Data Collection Procedure)                                           |
| 7. Participant knowledge of the interviewer   | What did the participants know about the researcher?                   | Page # 8 (Data Collection Procedure)                                           |
| 8. Interviewer characteristics                | What characteristics were reported about the inter viewer/facilitator? | Page # 8 (Data Collection Procedure)                                           |
| Domain 2: study design                        |                                                                        |                                                                                |
| 9. Methodological orientation and Theory      | What methodological orientation was stated to underpin the study?      | NA                                                                             |
| 10. Sampling                                  | How were participants selected?                                        | Page # 8 (Data Collection Methods and study participants)                      |
| 11. Method of approach                        | How were participants approached?                                      | Page # 8 (Data Collection Procedure)                                           |
| 12. Sample size                               | How many participants were in the study?                               | Page # 9 (Result)                                                              |
| 13. Non-participation                         | How many people refused to participate or dropped out? Reasons?        | Page # 9 (Result)                                                              |
| 14. Setting of data collection                | Where was the data collected?                                          | Page # 8 (Data Collection Procedure)                                           |
| 15. Presence of non-participants              | Was anyone else present besides the participants and researchers?      | Page # 8 (Data Collection Procedure)                                           |
| 16. Description of sample                     | What are the important characteristics of the sample?                  | Page # 8; Table 1 (Data Collection Methods and study participants)             |
| 17. Interview guide                           | Were questions, prompts, guides provided by the authors?               | Additional file -2 In-Depth Interview Guide for interviewing community members |
| 18. Repeat interviews                         | Were repeat interviews carried out?                                    | No                                                                             |
| 19. Audio/visual recording                    | Did the research use audio or visual recording to collect the data?    | Page # 8 (Data Collection Procedure)                                           |
| 20. Field notes                               | Were field notes made during and/or                                    | Page # 8 (Data Collection Procedure)                                           |

58 **5**59 **1**



1  
2  
3  
4  
5  
6  
7  
8  
9  
10  
11  
12  
13  
14  
15  
16  
17  
18  
19  
20  
21  
22  
23  
24  
25  
26  
27  
28  
29  
30  
31  
32  
33  
34  
35  
36  
37  
38  
39  
40  
41  
42  
43  
44  
45  
46  
47  
48  
49  
50  
51  
52  
53  
54  
55  
56  
57  
58  
59  
60

|                                    |                                                                                                         |                                             |
|------------------------------------|---------------------------------------------------------------------------------------------------------|---------------------------------------------|
|                                    | after the interview?                                                                                    |                                             |
| 21. Duration                       | What was the duration of the interviews                                                                 | Page # 8 (Data Collection Procedure)        |
| 22. Data saturation                | Was data saturation discussed?                                                                          | Page # 9 (Result)                           |
| 23. Transcripts returned           | Were transcripts returned to participants for comment and/or correction?                                | No                                          |
| Domain 3: analysis and findings    |                                                                                                         |                                             |
| 24. Number of data coders          | How many data coders coded the data?                                                                    | Page # 9 (Data Analysis)                    |
| 25. Description of the coding tree | Did authors provide a description of the coding tree?                                                   | NA                                          |
| 26. Derivation of themes           | Were themes identified in advance or derived from the data?                                             | Page # 9&10 (Result)                        |
| 27. Software                       | What software, if applicable, was used to manage the data?                                              | No (manually done) Page # 9 (Data Analysis) |
| 28. Participant checking           | Did participants provide feedback on the findings?                                                      | No                                          |
| 29. Quotations presented           | Were participant quotations presented to illustrate the themes/findings? Was each quotation identified? | Page # 9-18 (Results)                       |
| 30. Data and findings consistent   | Was there consistency between the data presented and the findings?                                      | Page # 9-18 (Results)                       |
| 31. Clarity of major themes        | Were major themes clearly presented in the findings?                                                    | Page # 9-18 (Results)                       |
| 32. Clarity of minor themes        | Is there a description of diverse cases or discussion of minor themes?                                  | Page # 9-18 (Results)                       |

## Additional file -2

## In-Depth Interview Guide for interviewing community members

## Basic Information

| S.no | Name<br>(Confidential) | Age | Sex | Occupation | Educational<br>level | Locality/site |
|------|------------------------|-----|-----|------------|----------------------|---------------|
|      |                        |     |     |            |                      |               |
|      |                        |     |     |            |                      |               |
|      |                        |     |     |            |                      |               |
|      |                        |     |     |            |                      |               |
|      |                        |     |     |            |                      |               |

**Perceptions on safety measures for preventing COVID-19**

1. What safety measures have you taken for yourself and for your family safety in COVID-19?

**Probes:** hand washing, sanitizer, social distancing, covering your cough, avoiding touching your eyes, nose, and mouth with unwashed hands, wearing a face mask, avoiding close contact with someone who is sick

2. Do you think novel coronavirus will inflict serious damage in your community, if adequate safety measures are not taken?
3. Do you think you can protect yourself against the novel coronavirus?

**Perception about fears, anxiety stress and coping about COVID-19**

1. How you perceive life during the COVID- pandemic?
  - a. Probes: affected daily routine
2. What are your fears and anxieties related to COVID-19?

- 1
- 2
- 3 3. What are the mental health consequences of the COVID-19 lockdown and social
- 4 isolation you and your family?
- 5
- 6
- 7 4. How the current pandemic has caused stress in life's of people and it has also
- 8 dramatically affected you and your family? (financial glitches, disputes, jobs)
- 9
- 10 5. How COVID-19 has influenced your temperament, feelings and emotions?
- 11
- 12 6. What is the effect of repeated media consumption about COVID-19 in traditional and
- 13 social media on mental health?
- 14
- 15 7. How do you cope with anxiety and fear related to COVID-19 pandemic?
- 16
- 17 8. Do you feel the need of having mental health programs or other measures to
- 18 overcome anxiety, fear and stress in this pandemic situation?
- 19
- 20 9. Do you have any suggestions on how government could provide support services for
- 21 coping with stress related to this crisis situation? (Coping strategies)
- 22
- 23
- 24 10. Currently, what sort of help or support is accessible to you and your family to cope
- 25 with the pandemic situation?
- 26
- 27 11. What are the best methods for promoting successful adherence to behavioral advice
- 28 about COVID-19 while enabling mental wellbeing and minimizing distress?
- 29
- 30
- 31

### 32 **Future Preparedness**

- 33
- 34 1. In your opinion, what are the needs for future preparedness for any outbreak that prepare
- 35 community (trainings, awareness, equipment, protective gears)
- 36
- 37
- 38
- 39
- 40
- 41
- 42
- 43
- 44
- 45
- 46
- 47
- 48
- 49
- 50
- 51
- 52
- 53
- 54
- 55
- 56
- 57
- 58
- 59
- 60

1 **Supplementary Material:**

2 Additional file 1: COREQ 32-ITEM CHECKLIST

3

4

| No. Item                                      | Guide questions/description                                            | Reported on Page #                                                             |
|-----------------------------------------------|------------------------------------------------------------------------|--------------------------------------------------------------------------------|
| Domain 1: Research team and reflexivity       |                                                                        |                                                                                |
| 1. Inter viewer/facilitator                   | Which author/s conducted the interview?                                | Page # 8 (Data Collection Procedure)                                           |
| 2. Credentials                                | What were the researcher's credentials?                                | Page # 8 (Data Collection Procedure)                                           |
| 3. Occupation                                 | What was their occupation at the time of the study?                    | Page # 8 (Data Collection Procedure)                                           |
| 4. Gender                                     | Was the researcher male or female?                                     | Page # 8 (Data Collection Procedure)                                           |
| 5. Experience and training                    | What experience or training did the researcher have?                   | Page # 8 (Data Collection Procedure)                                           |
| 6. Relationship with participants established | Was a relationship established prior to study commencement?            | Page # 8 (Data Collection Procedure)                                           |
| 7. Participant knowledge of the interviewer   | What did the participants know about the researcher?                   | Page # 8 (Data Collection Procedure)                                           |
| 8. Interviewer characteristics                | What characteristics were reported about the inter viewer/facilitator? | Page # 8 (Data Collection Procedure)                                           |
| Domain 2: study design                        |                                                                        |                                                                                |
| 9. Methodological orientation and Theory      | What methodological orientation was stated to underpin the study?      | NA                                                                             |
| 10. Sampling                                  | How were participants selected?                                        | Page # 8 (Data Collection Methods and study participants)                      |
| 11. Method of approach                        | How were participants approached?                                      | Page # 8 (Data Collection Procedure)                                           |
| 12. Sample size                               | How many participants were in the study?                               | Page # 9 (Result)                                                              |
| 13. Non-participation                         | How many people refused to participate or dropped out? Reasons?        | Page # 9 (Result)                                                              |
| 14. Setting of data collection                | Where was the data collected?                                          | Page # 8 (Data Collection Procedure)                                           |
| 15. Presence of non-participants              | Was anyone else present besides the participants and researchers?      | Page # 8 (Data Collection Procedure)                                           |
| 16. Description of sample                     | What are the important characteristics of the sample?                  | Page # 8; Table 1 (Data Collection Methods and study participants)             |
| 17. Interview guide                           | Were questions, prompts, guides provided by the authors?               | Additional file -2 In-Depth Interview Guide for interviewing community members |
| 18. Repeat interviews                         | Were repeat interviews carried out?                                    | No                                                                             |
| 19. Audio/visual recording                    | Did the research use audio or visual recording to collect the data?    | Page # 8 (Data Collection Procedure)                                           |
| 20. Field notes                               | Were field notes made during and/or                                    | Page # 8 (Data Collection Procedure)                                           |

1  
2  
3  
4  
5  
6  
7  
8  
9  
10  
11  
12  
13  
14  
15  
16  
17  
18  
19  
20  
21  
22  
23  
24  
25  
26  
27  
28  
29  
30  
31  
32  
33  
34  
35  
36  
37  
38  
39  
40  
41  
42  
43  
44  
45  
46  
47  
48  
49  
50  
51  
52  
53  
54  
55  
56  
57  
58  
59  
60

|                                    |                                                                                                         |                                             |
|------------------------------------|---------------------------------------------------------------------------------------------------------|---------------------------------------------|
|                                    | after the interview?                                                                                    |                                             |
| 21. Duration                       | What was the duration of the interviews                                                                 | Page # 8 (Data Collection Procedure)        |
| 22. Data saturation                | Was data saturation discussed?                                                                          | Page # 9 (Result)                           |
| 23. Transcripts returned           | Were transcripts returned to participants for comment and/or correction?                                | No                                          |
| Domain 3: analysis and findings    |                                                                                                         |                                             |
| 24. Number of data coders          | How many data coders coded the data?                                                                    | Page # 9 (Data Analysis)                    |
| 25. Description of the coding tree | Did authors provide a description of the coding tree?                                                   | NA                                          |
| 26. Derivation of themes           | Were themes identified in advance or derived from the data?                                             | Page # 9&10 (Result)                        |
| 27. Software                       | What software, if applicable, was used to manage the data?                                              | No (manually done) Page # 9 (Data Analysis) |
| 28. Participant checking           | Did participants provide feedback on the findings?                                                      | No                                          |
| 29. Quotations presented           | Were participant quotations presented to illustrate the themes/findings? Was each quotation identified? | Page # 9-18 (Results)                       |
| 30. Data and findings consistent   | Was there consistency between the data presented and the findings?                                      | Page # 9-18 (Results)                       |
| 31. Clarity of major themes        | Were major themes clearly presented in the findings?                                                    | Page # 9-18 (Results)                       |
| 32. Clarity of minor themes        | Is there a description of diverse cases or discussion of minor themes?                                  | Page # 9-18 (Results)                       |

1  
2  
3  
4  
5  
6  
7  
8  
9  
10  
11  
12  
13  
14  
15  
16  
17  
18  
19  
20  
21  
22  
23  
24  
25  
26  
27  
28  
29  
30  
31  
32  
33  
34  
35  
36  
37  
38  
39  
40  
41  
42  
43  
44  
45  
46  
47  
48  
49  
50  
51  
52  
53  
54  
55  
56  
57  
58  
59  
60

For peer review only
